# Supplementary material for: Partial loss-of-function mutations in GINS4 lead to NK cell deficiency with neutropenia
Source: PubMed Central journal article supplement (PMC9675456; doi:10.1172/jci.insight.154948), 2022-11-08

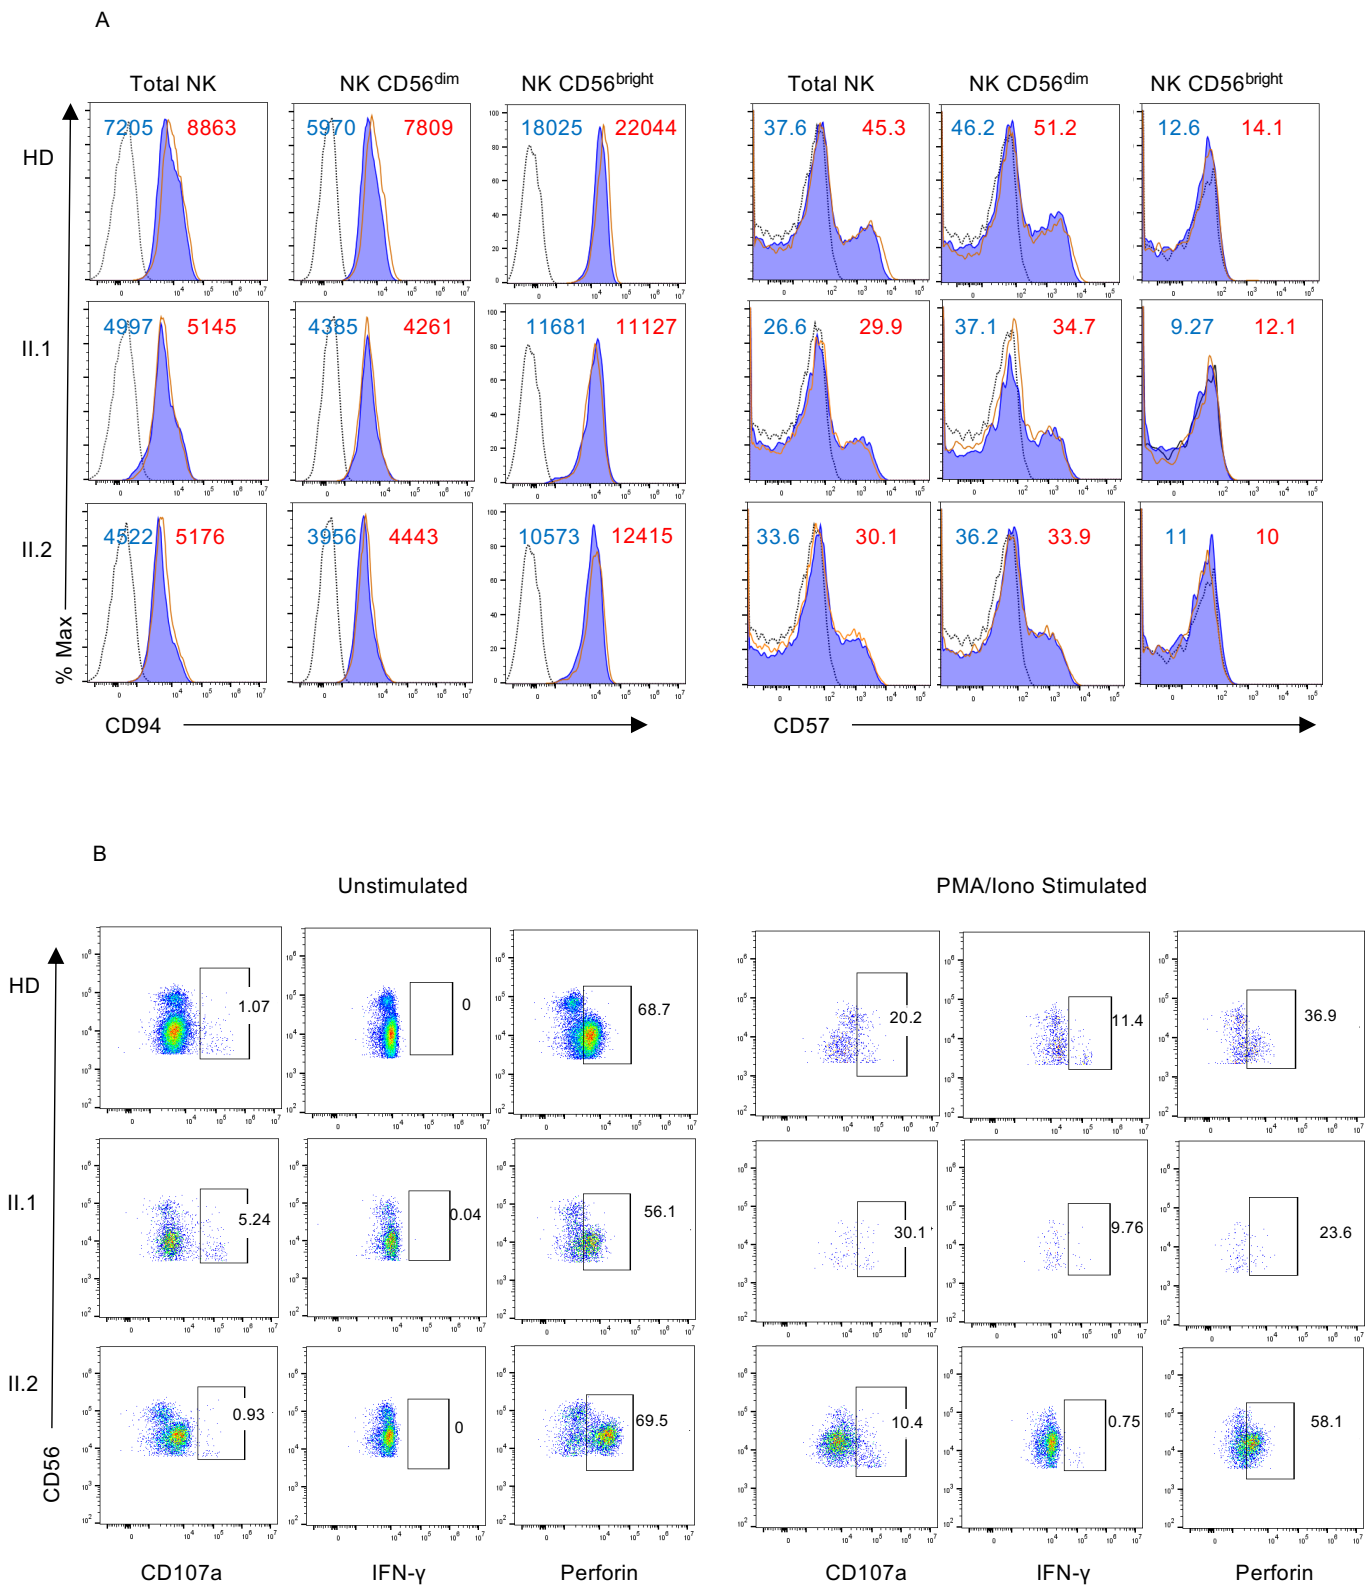

**Supplemental Figure 1. NK cells phenotype and function.** A) Expression of CD94 and CD57 on total NK cells, CD56<sup>dim</sup>, and CD56<sup>bright</sup> NK cells at baseline and after stimulation with 50ng/ml IL-15 for 48 hours showing FMO control (dotted line), resting PBMC (blue line), activated PBMC (red line). Mean fluorescence intensity (MFI) is indicated. B) Expression of CD107a, perforin and IFN- $\gamma$  of resting NK cells and after 4 hours of PMA/Ionomycin stimulation. Healthy donor (HD, shipping control), II.1 and II.2 individuals are indicated.

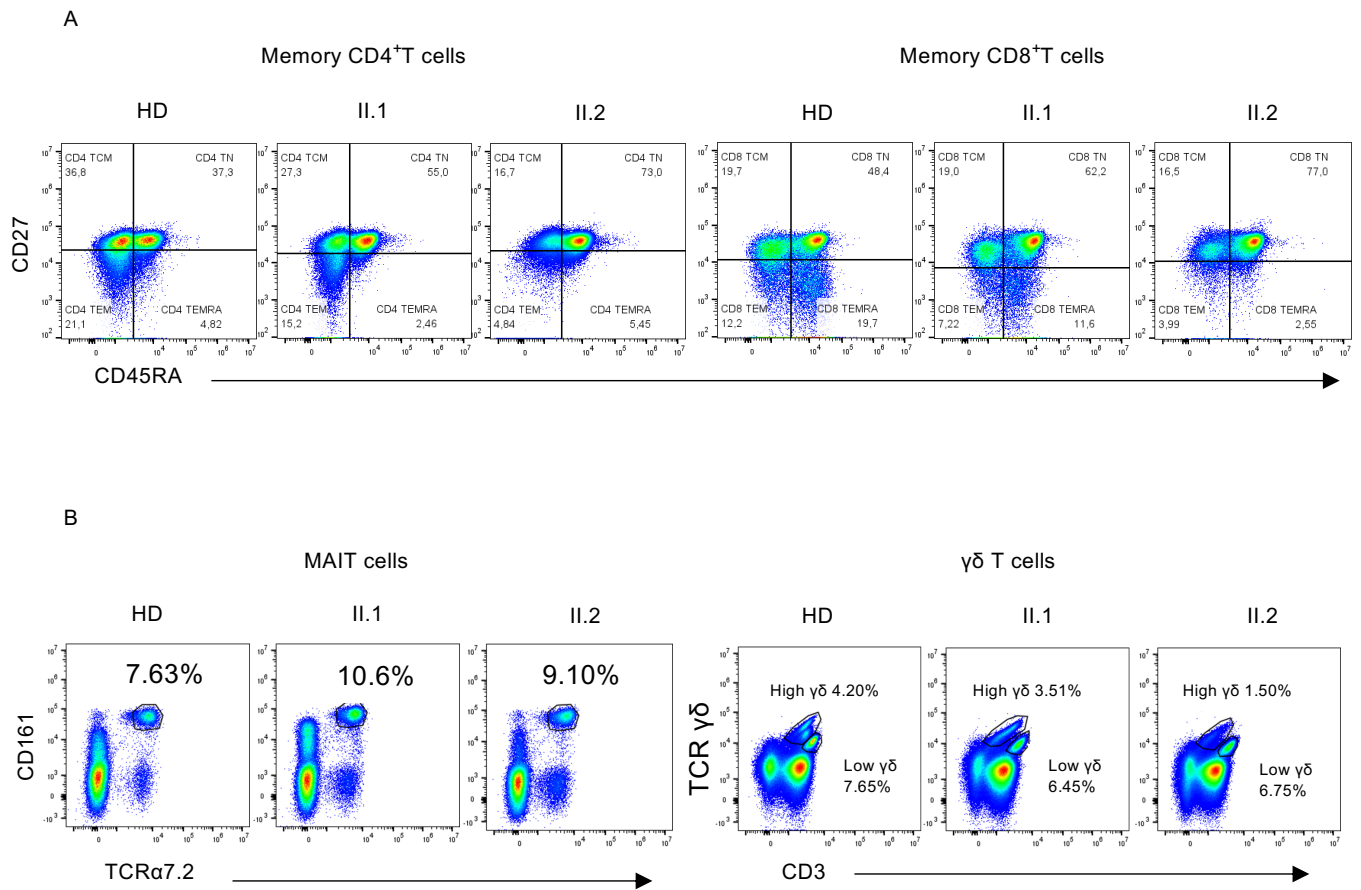

**Supplemental Figure 2. Conventional T cells, MAIT cells and  $\gamma\delta$  T cells.** A) Percentages of naïve T cells (TN), effector memory T cells (TEM), central memory T cells (TCM) and effector memory CD45RA<sup>+</sup>T cells (TEMRA) of PBMC. B) Percentages of mucosal-associated invariant T (MAIT) cells and  $\gamma\delta$  T cells in healthy donor (HD, shipping control), II.1, II.2 individuals PBMC. MAIT cells were defined as CD3<sup>+</sup>CD8<sup>+</sup>CD161<sup>+</sup>TCR $\alpha$ 7.2<sup>+</sup> and  $\gamma\delta$  T cells as CD3<sup>+</sup>TCR $\gamma\delta$ <sup>+</sup>.

GINS4: Chr 8:41399354\_G>C:  
NM\_032336:exon7:c.G511C:p.V171L

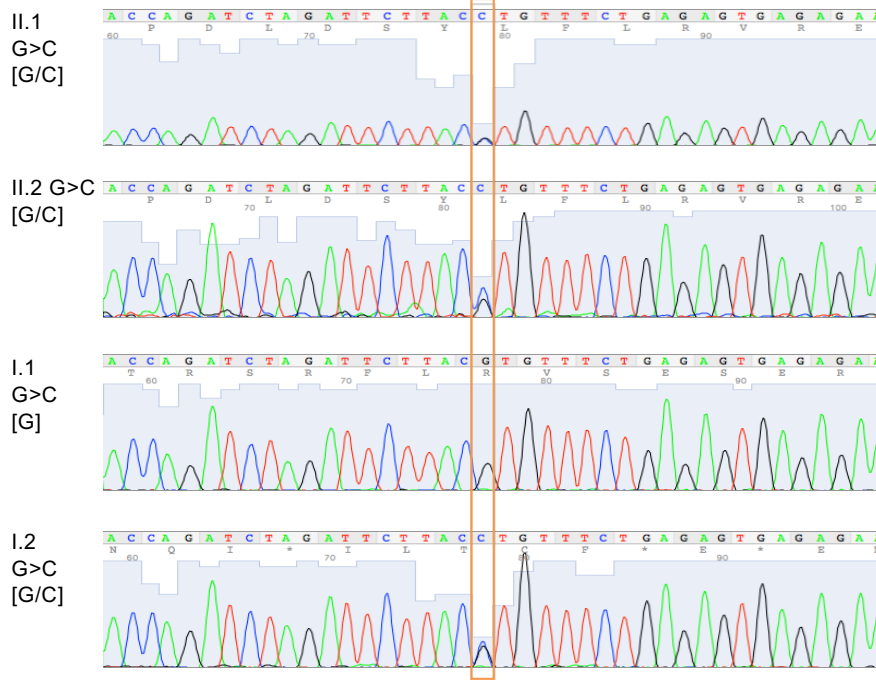

GINS4: Chr 8:41399414\_C>T:  
NM\_032336:exon7:c.C571T:p.Q191X

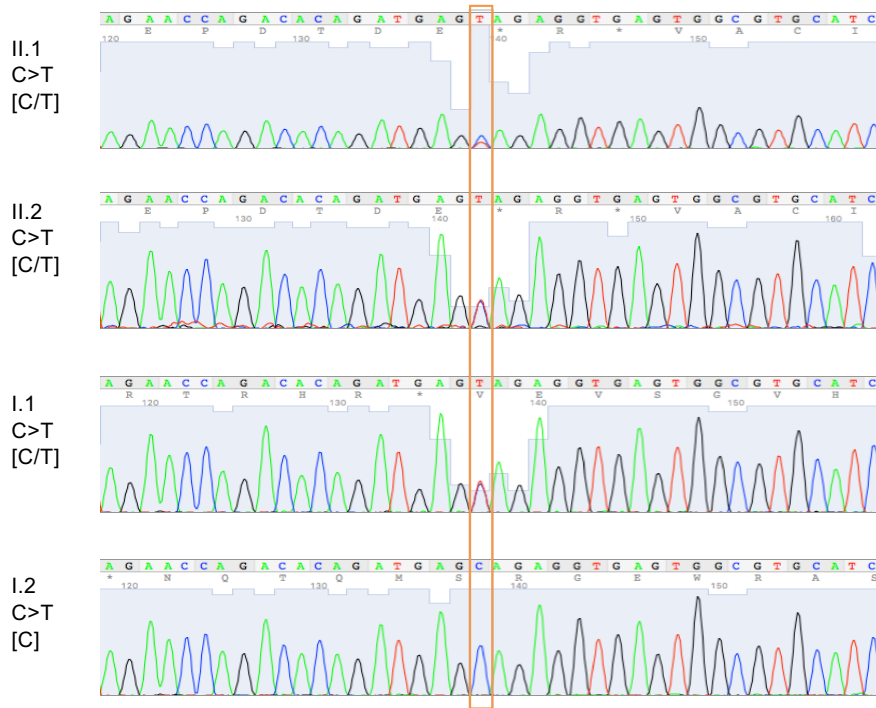

**Supplemental Figure 3.** Sanger sequencing confirmation in patient blood-derived DNA

A

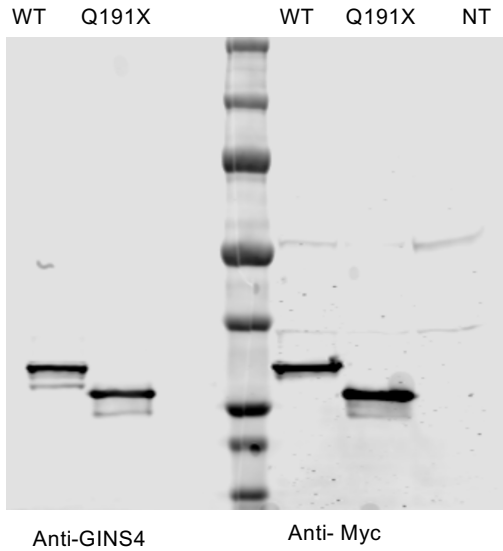

B

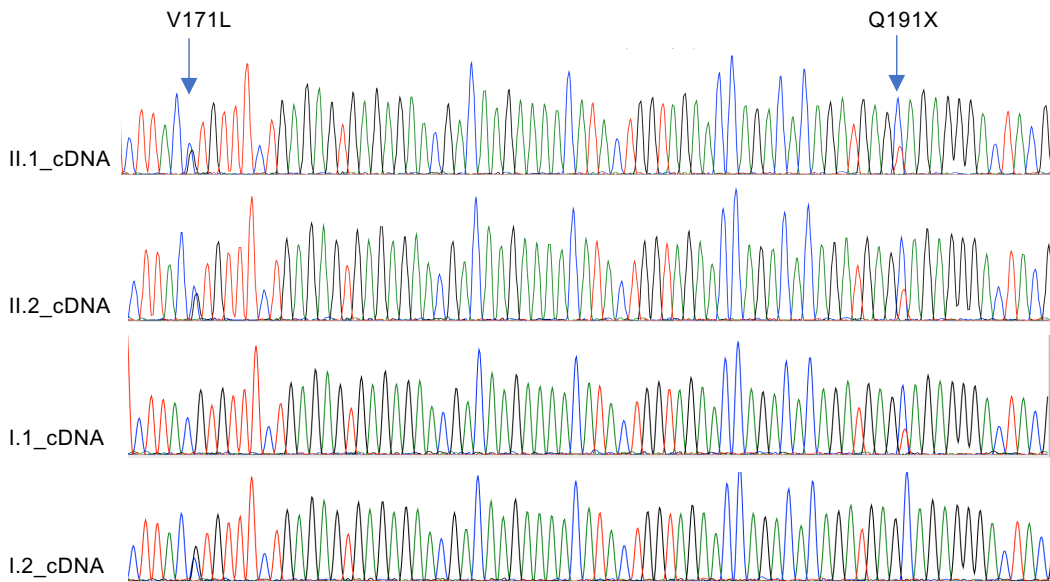

**Supplemental Figure 4.** A) Overexpression of the WT and stop codon variant Q191X in HEK293T. Immunoblotting with anti-GINS4 antibody and anti-Myc antibody, shows the antibody specificity to the full length protein and the stop codon allele-encoded variant. B) Stability of the stop codon at the mRNA level. The residue affecting the Q191X variant was identified in cDNA from the proband's cells and thus is present at the mRNA level, suggesting that if NMD occurs it is likely only partial.



A

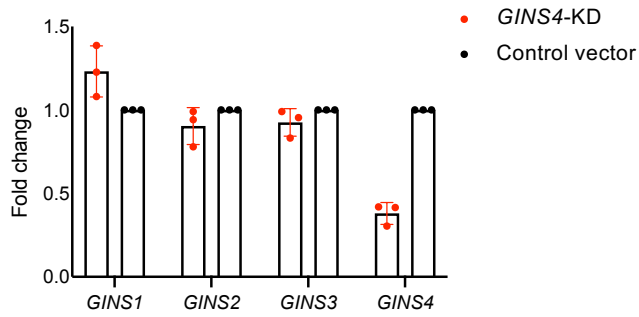

B

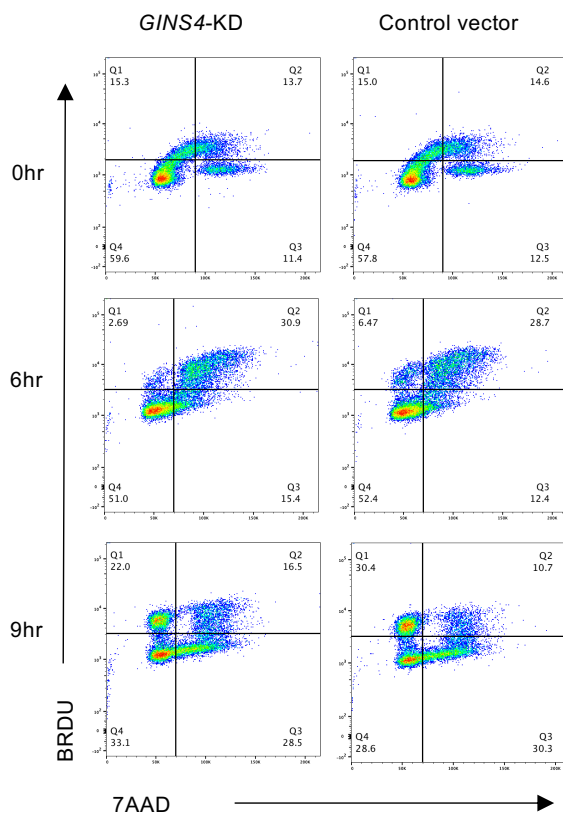

**Supplemental Figure 5.** A) Confirmatory qPCR analysis of *GINS4* expression in *GINS4* KD cell line. No off-target effect on other GINS are identified. B) Cell cycle progression analysis in *GINS4*-KD cell line. Representative flow cytometry plots of *GINS4*-KD and control vector cell lines shortly pulsed with BrdU and analyzed after 6 and 9 hours.

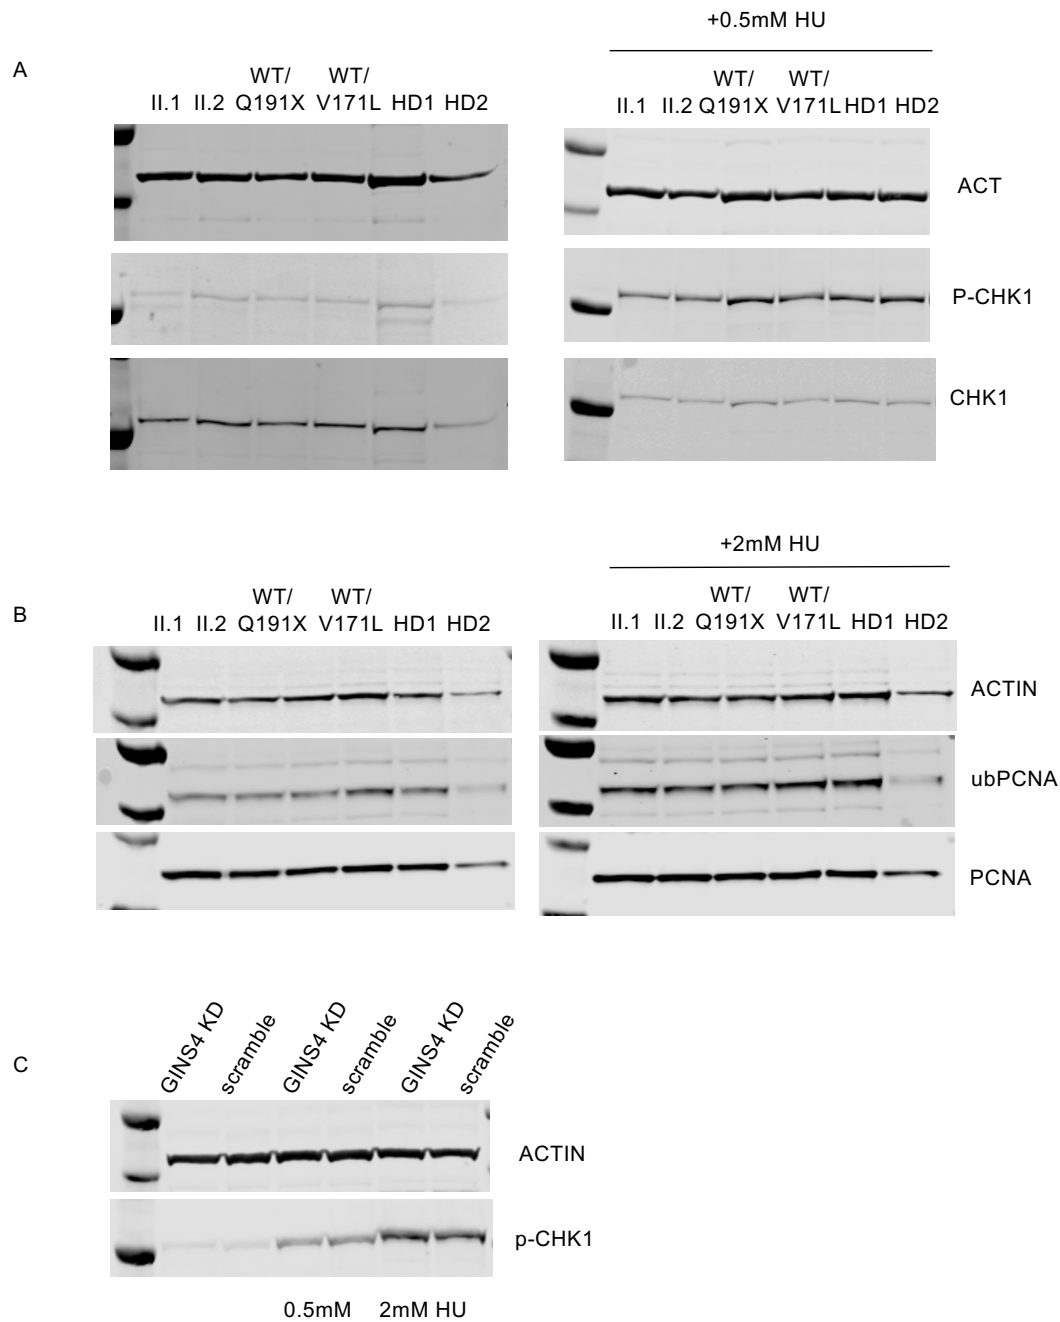

**Supplemental Figure 6. individuals-derived cells show no impairments in DNA damage response.** A) Phosphorylation of checkpoint 1 (p-CBK1) was evaluated at baseline and after 24hr of 0.5 hydroxyurea (HU) treatment in GINS4 family members and 2 HD. B) Ubiquitination of PCNA (ub-PCNA) was assessed at baseline and after 24hr of 2  $\mu$ M hydroxyurea (HU) treatment in GINS4 family members and 2 HD. C) p-CBK1 was assessed at baseline and after 24hr of 0.5 and 2uM of HU treatment. Actin was used as a loading control. Data are representative of 2 independent experiments.

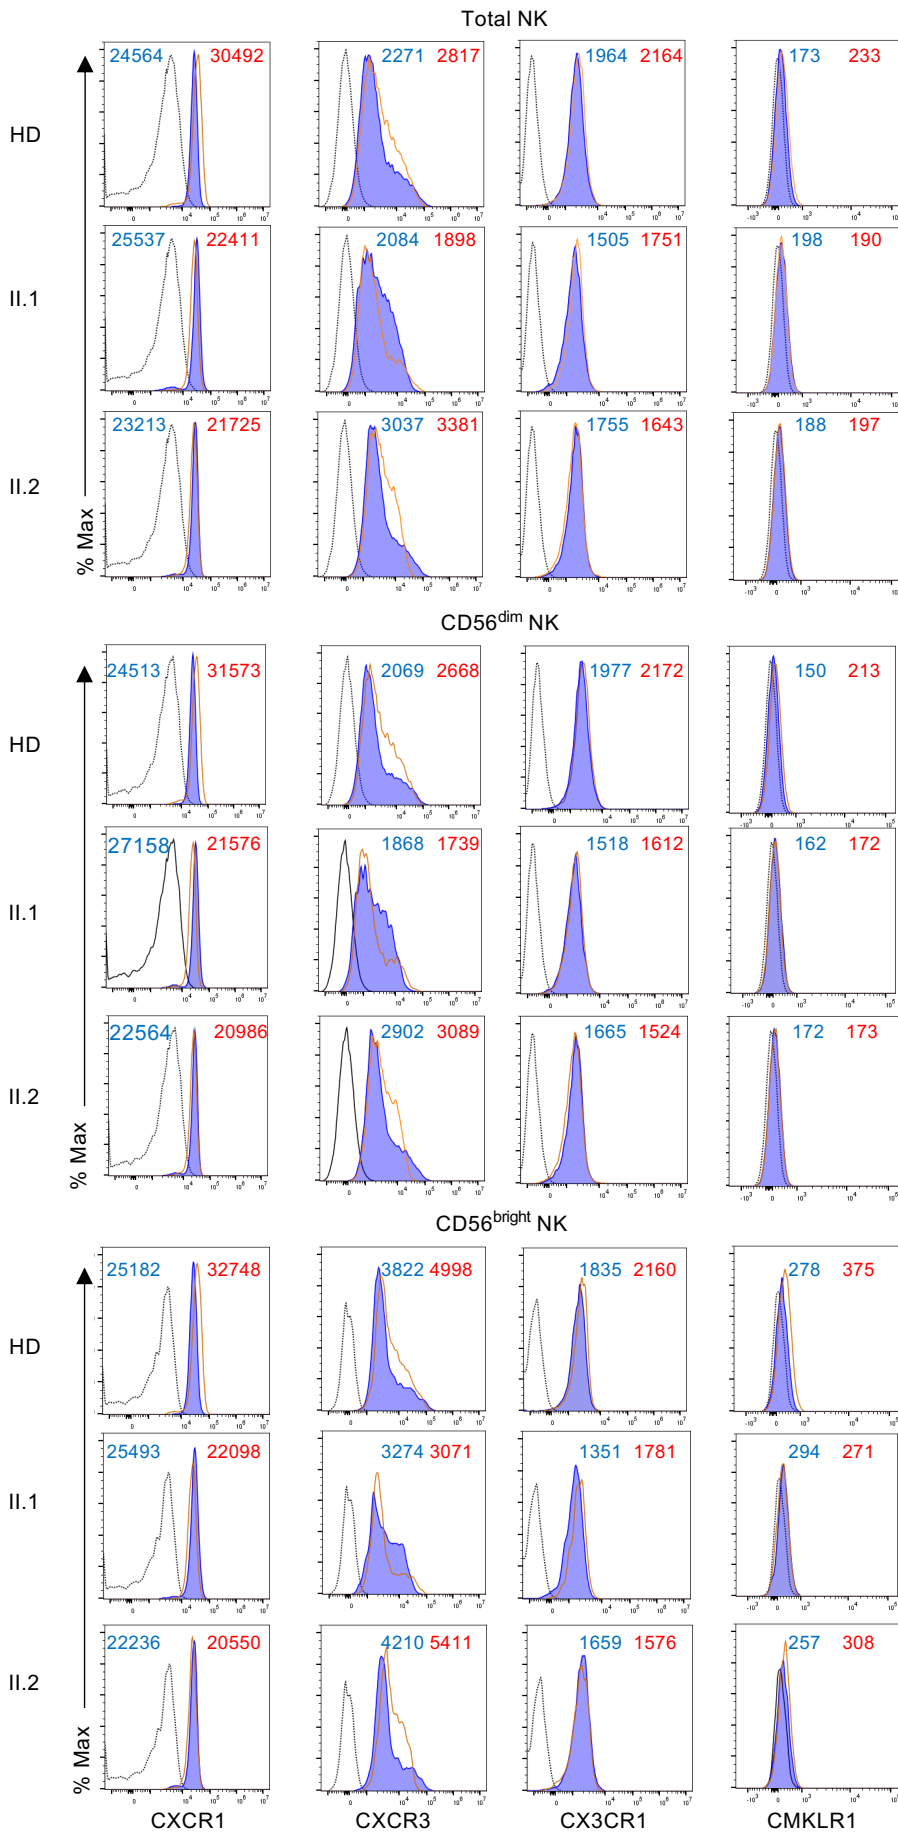

**Supplemental Figure 7. Chemokine receptors expression in NK cell subsets.** Expression of CXCR1, CXCR3, CX3CR1, AND CMKLR1 in total NK cells, CD56<sup>dim</sup> NK, and CD56<sup>bright</sup> NK at baseline and after stimulation with IL-15 for 48 hours. Dotted line: FMO control. Blue line: resting cells. Red line: PBMC stimulated with 50ng/ml IL-15. Mean fluorescence intensity (MFI) is indicated. Healthy donor (HD, shipping control), II.1, II.2 individuals are indicated.

A

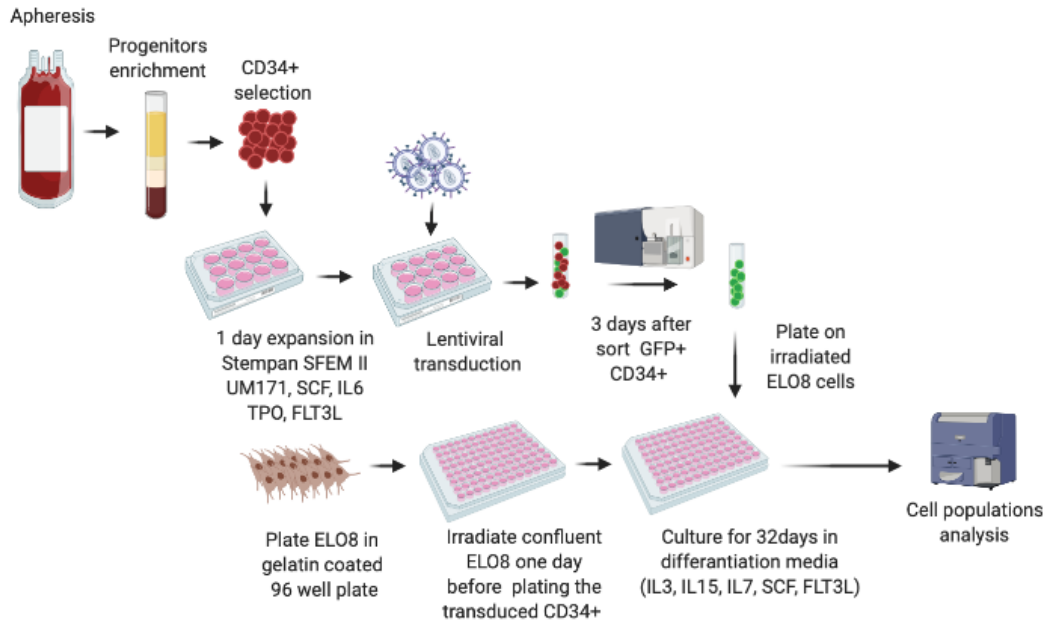

B

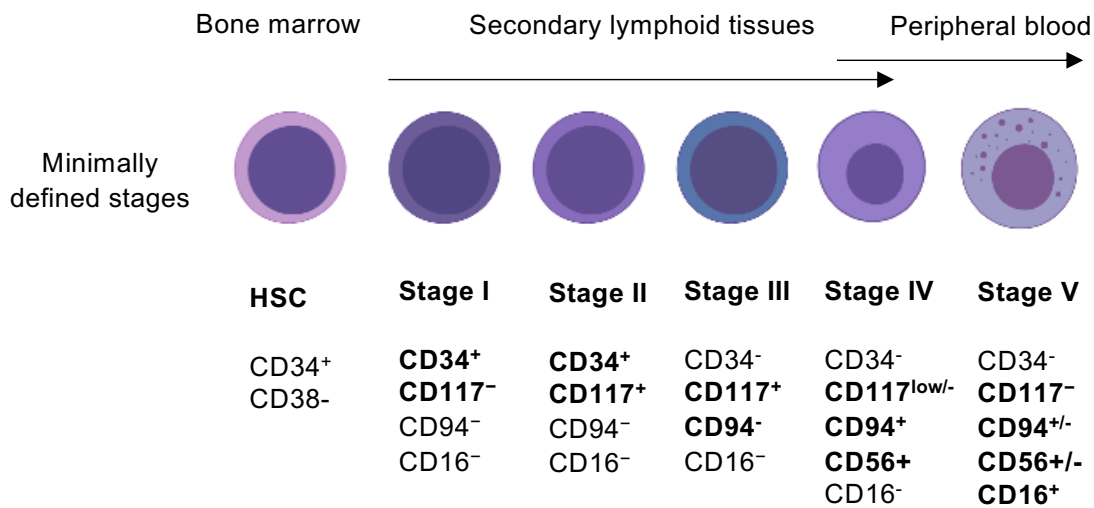

C

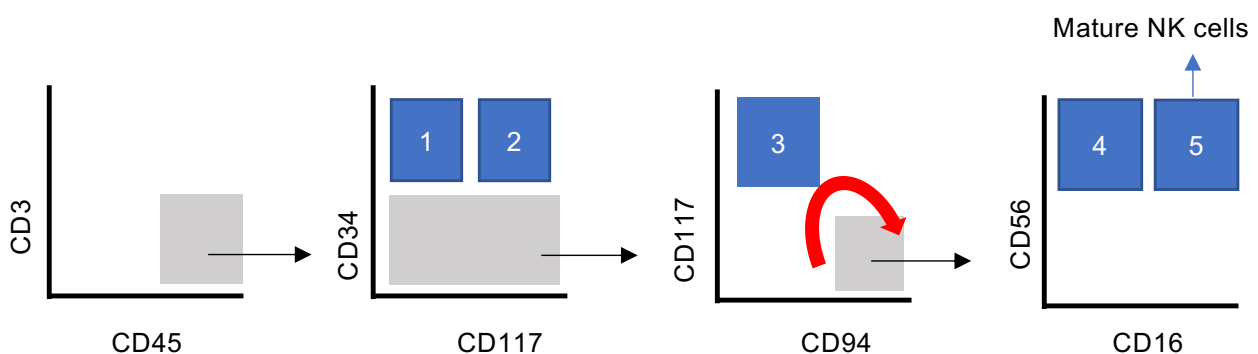

**Supplemental Figure 8.** A) CD34<sup>+</sup> HSC precursors were isolated from apheresis products and expanded for one day in serum-free Stem Span II media supplemented with 35 nM UM171 and 100ng/ml of IL6, TPO, Flt3L, and SCF; then transduced with *GINS4* pGFP-C-shLenti or control vector pGFP-C-shLenti. Three days post transduction, GFP-positive cells were sorted and then co-cultured with irradiated EL08.1D2 stromal cells in the presence of cytokines as described in 'Methods'. Cells were harvested at day 32 and NK cell maturation was analyzed by FACS. B) Minimally defined stages of NK differentiation in vitro according to (Chichocki et al. 2010). C) Flow cytometry gating strategy that was applied to the differentiated cells on day 32. Schematic representation were created with biorender.com

| Blood cell populations                            | II.1 (proband)               | II.2 (sister)          | I.1 (mother)        |
|---------------------------------------------------|------------------------------|------------------------|---------------------|
| WBC                                               | 3690                         | 4230                   | 8280                |
| <b>Neutrophils</b>                                | <b>270</b>                   | 1050                   | 4930                |
| Lymphocytes                                       | 2730                         | 2480                   | 2490                |
| Monocytes                                         | 650                          | 640                    | 610                 |
| Eosynophils                                       | 10                           | 40                     | 210                 |
| Platelets                                         | 432000                       | 374000                 | 354000              |
| Total lymphocyte                                  | 69.51 % (2565)               | 60.91 % (2576)         | 30.19 % (2500)      |
| CD3 <sup>+</sup> T cells                          | 54.57 % (2014)               | 41.33 % (1748)         | 16.88 % (1398)      |
| CD4 <sup>+</sup> T cells                          | 28 % (763)                   | 21.9 % (926)           | 11.64 % (964)       |
| CD8 <sup>+</sup> T cells                          | 20.67 % (763)                | 13.73 % (581)          | 4.24 % (351)        |
| CD4 <sup>+</sup> /CD8 <sup>+</sup> T cells        | 0.41 % (15)                  | 0.06 % (3)             | 0.27 % (22)         |
| CD4 <sup>-</sup> /CD8 <sup>-</sup> T cells        | 5.49 % (203)                 | 5.64 % (239)           | 0.73 % (60)         |
| CD4/CD8 ratio                                     | 1.35                         | 1.6                    | 2.75                |
| CD19 <sup>+</sup> B cells                         | 13.81 % (510)                | 16.54 % (700)          | 7.38 % (611)        |
| <b>CD3<sup>-</sup> /CD56<sup>+</sup> NK cells</b> | <b>1.13% (42)</b>            | <b>3.04 % (129)</b>    | <b>5.93 % (491)</b> |
| Immunoglobulin levels                             |                              |                        |                     |
| IgG                                               | 7 yo - <b>1361</b> (453-916) | 7 yo - 1283 (700-1600) |                     |
|                                                   | 14 yo - 1471 (700-1600)      |                        |                     |
| IgA                                               | 7 yo - <b>346</b> (20-100)   | 7 yo - 248 (70-400)    |                     |
|                                                   | 14 yo - <b>453</b> (70-400)  |                        |                     |
| IgM                                               | 7 yo - 91 (19-146)           | 7 yo - 67 (40-230)     |                     |
|                                                   | 14 yo - 52 (40-230)          |                        |                     |
| IgE                                               | 14 yo - <b>82</b> (0-60)     |                        |                     |

**Supplemental table 1.** Count and percentage of blood cells and immunoglobulons levels. Normal count range of NK cells=100-1400.

Supplemental Table 2. List of prioritized variants

| GENE   | chromosomal coordinates (hg19) | Zygosity | Mutation type          | ExAC_ALL | Potential_InTrans | pLI      | CADD score | coding change                                                                    |
|--------|--------------------------------|----------|------------------------|----------|-------------------|----------|------------|----------------------------------------------------------------------------------|
| LYST   | 1:235972859_BH9327-1_G>A       | Het      | nonsynonymous_SNV      |          | FALSE             | 0,999978 | 26,4       | LYST:NM_000081:exon5:c.C1259T:p.A420V                                            |
| MDC1   | 6:30673730_BH9327-1_G>A        | Het      | nonsynonymous_SNV      |          | FALSE             | 0,000942 | 10,2       | MDC1:NM_014641:exon10:c.C3230T:p.T1077I                                          |
| TCIRG1 | 11:67811770_BH9327-1_C>T       | Het      | stopgain_SNV           | 4,85E-05 | FALSE             | 6,04E-06 | 24,9       | TCIRG1:NM_006019:exon9:c.C979T:p.R327X                                           |
| GINS4  | 8:41399354_BH9327-1_G>C        | Het      | nonsynonymous_SNV      |          | TRUE              | 0,050473 | 32         | GINS4:NM_032336:exon7:c.G511C:p.V171L                                            |
| GINS4  | 8:41399414_BH9327-1_C>T        | Het      | stopgain_SNV           |          | TRUE              | 0,050473 | 39         | GINS4:NM_032336:exon7:c.C571T:p.Q191X                                            |
| GSTP1  | 11:67352153_BH9327-1_C>T       | Het      | splicing               |          | FALSE             | 0,115024 |            | GSTP1(NM_000852:exon4:c.145-3C>T)                                                |
| SLC2A1 | 1:43408997_BH9327-1_G>A        | Het      | splicing               | 0,0001   | FALSE             | 0,939808 |            | SLC2A1(NM_006516:exon3:c.19-5C>T)                                                |
| EIF3B  | 7:2415100_BH9327-1_G>A         | Het      | nonsynonymous_SNV      |          | FALSE             | 0,999971 | 25,8       | EIF3B:NM_003751:exon14:c.G1966A:p.D656N                                          |
| FGFR2  | 10:123239375_BH9327-1_G>A      | Het      | nonsynonymous_SNV      |          | FALSE             | 0,999752 | 26,9       | FGFR2:NM_023029:exon16:c.C2195T:p.T732I                                          |
| MAP3K4 | 6:161510358_BH9327-1_A>G       | Het      | nonsynonymous_SNV      |          | FALSE             | 0,999992 | 25,1       | MAP3K4:NM_006724:exon11:c.A2828G:p.D943G                                         |
| MAP3K6 | 1:27690566_BH9327-1_G>A        | Het      | nonsynonymous_SNV      | 2,55E-05 | FALSE             | 4,91E-15 | 34         | MAP3K6:NM_004672:exon5:c.C706T:p.R236W                                           |
| MDM4   | 1:204518385_BH9327-1_C>T       | Het      | nonsynonymous_SNV      |          | FALSE             | 0,99857  | 14,55      | MDM4:NM_001278519:exon5:c.C379T:p.P127S                                          |
| RNF19A | 8:101272193_BH9327-1_C>T       | Het      | nonsynonymous_SNV      | 1,65E-05 | FALSE             | 0,027076 | 24,2       | RNF19A:NM_015435:exon10:c.G1715A:p.R572Q                                         |
| SHC3   | 9:91661883_BH9327-1_G>C        | Het      | nonsynonymous_SNV      |          | FALSE             | 0,457669 | 5,189      | SHC3:NM_016848:exon8:c.C989G:p.T330R                                             |
| STIM2  | 4:27004559_BH9327-1_G>A        | Het      | nonsynonymous_SNV      | 1,70E-05 | FALSE             | NA       | 28,5       | STIM2:NM_001169117:exon7:c.G814A:p.A272T                                         |
| TCF19  | 6:31129779_BH9327-1_C>G        | Het      | nonsynonymous_SNV      | 9,15E-06 | FALSE             | 0,000233 | 0,312      | TCF19:NM_001077511:exon3:c.C794G:p.T265S                                         |
| SFPQ   | 1:35653649_BH9327-1_AATC>A     | Het      | nonframeshift_deletion |          | FALSE             | 0,999527 |            | NONE(dist-NONE),NONE(dist-NONE),SFPQ:NM_005066:exon7:c.1737_1739del:p.579_580del |
| ATAD3A | 1:1452592_BH9327-1_T>C         | Hom      | nonsynonymous_SNV      | 0,0004   | FALSE             | 0,040131 | 0,002      | ATAD3A:NM_018188:exon3:c.T328C:p.W110R                                           |
| LILRA3 | 19:54802732_BH9327-1_C>T       | Hom      | nonsynonymous_SNV      |          | FALSE             | 0,002925 |            | LILRA3:NM_006865:exon5:c.G709A:p.A237T                                           |
| KMT2C  | 7:151860023_BH9327-1_A>G       | Het      | nonsynonymous_SNV      | 0,0021   | FALSE             | 1        | 23,4       | KMT2C:NM_170606:exon43:c.T10639C:p.S3547P                                        |
| KMT2C  | 7:151935797_BH9327-1_TG>T      | Het      | frameshift_deletion    | 0,001    | FALSE             | 1        |            | NONE(dist-NONE),NONE(dist-NONE),KMT2C:NM_170606:exon15:c.2646delC:p.I882fs       |
| MST1L  | 1:17086716_BH9327-1_G>A        | Het      | nonsynonymous_SNV      |          | TRUE              | NA       |            | MST1L:NM_001271733:exon5:c.C527T:p.T176I                                         |
| MST1L  | 1:17086974_BH9327-1_G>A        | Het      | nonsynonymous_SNV      |          | TRUE              | NA       |            | MST1L:NM_001271733:exon4:c.C350T:p.T117M                                         |
| SOX18  | 20:62679616_BH9327-1_C>T       | Het      | nonsynonymous_SNV      | 2,61E-05 | TRUE              | NA       | 23,9       | SOX18:NM_018419:exon2:c.G1058A:p.G353D                                           |
| SOX18  | 20:62680265_BH9327-1_C>T       | Het      | nonsynonymous_SNV      | 0,001    | TRUE              | NA       | 28,6       | SOX18:NM_018419:exon2:c.G409A:p.E137K                                            |
| TNXB   | 6:32021362_BH9327-1_A>G        | Het      | nonsynonymous_SNV      | 0,0061   | TRUE              | 0,774154 | 0,003      | TNXB:NM_019105:exon25:c.T8588C:p.M2863T                                          |
| TNXB   | 6:32038185_BH9327-1_C>T        | Het      | nonsynonymous_SNV      | 5,17E-05 | TRUE              | 0,774154 | 8,068      | TNXB:NM_019105:exon14:c.G4997A:p.R1666Q                                          |
| ZNF678 | 1:227842964_BH9327-1_G>A       | Het      | nonsynonymous_SNV      | 1,69E-05 | FALSE             | 4,67E-07 | 0,041      | ZNF678:NM_178549:exon4:c.G1178A:p.S393N                                          |
| ZNF678 | 1:227842973_BH9327-1_G>A       | Het      | nonsynonymous_SNV      | 3,40E-05 | FALSE             | 4,67E-07 | 9,631      | ZNF678:NM_178549:exon4:c.G1187A:p.R396K                                          |

Supplemental Table 3. Customized immune panel

| Probe Name | Accession #    | Class Name |
|------------|----------------|------------|
| ABCB1      | NM_000927.3    | Endogenous |
| ABL1       | NM_005157.3    | Endogenous |
| ADA        | NM_000022.2    | Endogenous |
| AHR        | NM_001621.3    | Endogenous |
| AICDA      | NM_020661.1    | Endogenous |
| AIRE       | NM_000383.2    | Endogenous |
| APP        | NM_000484.3    | Endogenous |
| ARG1       | NM_000045.2    | Endogenous |
| ARG2       | NM_001172.3    | Endogenous |
| ARHGDI1    | NM_001175.4    | Endogenous |
| ATG10      | NM_001131028.1 | Endogenous |
| ATG12      | NM_004707.2    | Endogenous |
| ATG16L1    | NM_198890.2    | Endogenous |
| ATG5       | NM_004849.2    | Endogenous |
| ATG7       | NM_001136031.2 | Endogenous |
| ATM        | NM_000051.3    | Endogenous |
| ATR        | NM_001184.2    | Endogenous |
| B2M        | NM_004048.2    | Endogenous |
| B3GAT1     | NM_018644.3    | Endogenous |
| BAD        | NM_004322.3    | Endogenous |
| BATF       | NM_006399.3    | Endogenous |
| BATF3      | NM_018664.2    | Endogenous |
| BAX        | NM_138761.3    | Endogenous |
| BCAP31     | NM_005745.7    | Endogenous |
| BCL10      | NM_003921.2    | Endogenous |
| BCL2       | NM_000657.2    | Endogenous |
| BCL2L11    | NM_138621.4    | Endogenous |
| BCL3       | NM_005178.2    | Endogenous |
| BCL6       | NM_001706.2    | Endogenous |
| CD244      | NM_016382.2    | Endogenous |
| BLNK       | NM_013314.2    | Endogenous |
| BRCA1      | NM_007305.2    | Endogenous |
| BST1       | NM_004334.2    | Endogenous |
| BST2       | NM_004335.2    | Endogenous |
| BTK        | NM_000061.1    | Endogenous |
| BTLA       | NM_181780.2    | Endogenous |
| C14orf166  | NM_016039.2    | Endogenous |
| C1QA       | NM_015991.2    | Endogenous |
| C1QB       | NM_000491.3    | Endogenous |
| C1QBP      | NM_001212.3    | Endogenous |

|          |                |            |
|----------|----------------|------------|
| C1R      | NM_001733.4    | Endogenous |
| C1S      | NM_001734.2    | Endogenous |
| C2       | NM_000063.3    | Endogenous |
| C3       | NM_000064.2    | Endogenous |
| C4A/B    | NM_007293.2    | Endogenous |
| C4BPA    | NM_000715.3    | Endogenous |
| C5       | NM_001735.2    | Endogenous |
| C6       | NM_000065.2    | Endogenous |
| C7       | NM_000587.2    | Endogenous |
| C8A      | NM_000562.2    | Endogenous |
| C8B      | NM_000066.2    | Endogenous |
| C8G      | NM_000606.2    | Endogenous |
| C9       | NM_001737.3    | Endogenous |
| CAMP     | NM_004345.3    | Endogenous |
| CARD9    | NM_052813.4    | Endogenous |
| CASP1    | NM_001223.3    | Endogenous |
| CASP10   | NM_032977.3    | Endogenous |
| CASP2    | NM_032982.2    | Endogenous |
| FAS      | NM_000043.3    | Endogenous |
| CASP8    | NM_001228.4    | Endogenous |
| CCBP2    | NM_001296.3    | Endogenous |
| FCER1A   | NM_002001.2    | Endogenous |
| CCL13    | NM_005408.2    | Endogenous |
| FCGR1A/B | NM_000566.3    | Endogenous |
| CCL16    | NM_004590.2    | Endogenous |
| FCGR2A/C | NM_201563.4    | Endogenous |
| CCL19    | NM_006274.2    | Endogenous |
| FCGR3A/B | NM_000570.4    | Endogenous |
| CCL20    | NM_004591.1    | Endogenous |
| CCL22    | NM_002990.3    | Endogenous |
| CCL23    | NM_145898.1    | Endogenous |
| CCL24    | NM_002991.2    | Endogenous |
| CCL26    | NM_006072.4    | Endogenous |
| IL12RB1  | NM_005535.1    | Endogenous |
| CCL4     | NM_002984.2    | Endogenous |
| CCL5     | NM_002985.2    | Endogenous |
| CCL7     | NM_006273.2    | Endogenous |
| CCL8     | NM_005623.2    | Endogenous |
| CCND3    | NM_001760.2    | Endogenous |
| CCR1     | NM_001295.2    | Endogenous |
| CCR10    | NM_016602.2    | Endogenous |
| CCR2     | NM_001123041.2 | Endogenous |



|         |                   |            |
|---------|-------------------|------------|
| CCR5    | NM_000579.1       | Endogenous |
| CCR6    | NM_031409.2       | Endogenous |
| CCR7    | NM_001838.2       | Endogenous |
| CCR8    | NM_005201.2       | Endogenous |
| CCRL1   | NM_016557.2       | Endogenous |
| CCRL2   | NM_003965.4       | Endogenous |
| CD14    | NM_000591.2       | Endogenous |
| CD160   | NM_007053.2       | Endogenous |
| CD163   | NM_004244.4       | Endogenous |
| CD164   | NM_006016.4       | Endogenous |
| CD19    | NM_001770.4       | Endogenous |
| CD1A    | NM_001763.2       | Endogenous |
| CD1D    | NM_001766.3       | Endogenous |
| CD2     | NM_001767.3       | Endogenous |
| CD209   | NM_021155.2       | Endogenous |
| CD22    | NM_001771.2       | Endogenous |
| CD24    | NM_013230.2       | Endogenous |
| IL18RAP | NM_003853.2       | Endogenous |
| CD247   | NM_198053.1       | Endogenous |
| CD27    | NM_001242.4       | Endogenous |
| CD274   | NM_014143.3       | Endogenous |
| CD276   | NM_001024736.1    | Endogenous |
| CD28    | NM_001243078.1    | Endogenous |
| CD34    | NM_001025109.1    | Endogenous |
| CD36    | NM_001001548.2    | Endogenous |
| CD3D    | NM_000732.4       | Endogenous |
| CD3E    | NM_000733.2       | Endogenous |
| CD3EAP  | NM_012099.1       | Endogenous |
| CD4     | NM_000616.4       | Endogenous |
| CD40    | NM_001250.4       | Endogenous |
| CD40LG  | NM_000074.2       | Endogenous |
| CD44    | NM_001001392.1    | Endogenous |
| CD45R0  | NM_080921.3       | Endogenous |
| CD45RA  | NM_002838.4       | Endogenous |
| CD45RB  | ENST00000367367.1 | Endogenous |
| CD46    | NM_172350.1       | Endogenous |
| IL21R   | NM_021798.2       | Endogenous |
| CD5     | NM_014207.2       | Endogenous |
| CD53    | NM_001040033.1    | Endogenous |
| CD55    | NM_000574.3       | Endogenous |
| CD58    | NM_001779.2       | Endogenous |
| CD59    | NM_000611.4       | Endogenous |

|         |                |            |
|---------|----------------|------------|
| CD6     | NM_006725.3    | Endogenous |
| CD7     | NM_006137.6    | Endogenous |
| CD70    | NM_001252.2    | Endogenous |
| CD74    | NM_001025159.1 | Endogenous |
| CD79A   | NM_001783.3    | Endogenous |
| CD79B   | NM_021602.2    | Endogenous |
| CD80    | NM_005191.3    | Endogenous |
| CD81    | NM_004356.3    | Endogenous |
| CD82    | NM_002231.3    | Endogenous |
| CD83    | NM_004233.3    | Endogenous |
| CD86    | NM_175862.3    | Endogenous |
| CD8A    | NM_001768.5    | Endogenous |
| CD8B    | NM_004931.3    | Endogenous |
| CD9     | NM_001769.2    | Endogenous |
| CD96    | NM_005816.4    | Endogenous |
| CD97    | NM_078481.2    | Endogenous |
| CD99    | NM_002414.3    | Endogenous |
| CDH5    | NM_001795.3    | Endogenous |
| CDK2    | NM_001798.2    | Endogenous |
| CDKN1A  | NM_000389.2    | Endogenous |
| CEACAM1 | NM_001712.3    | Endogenous |
| CEACAM6 | NM_002483.4    | Endogenous |
| CEACAM8 | NM_001816.3    | Endogenous |
| CEBPB   | NM_005194.2    | Endogenous |
| CFB     | NM_001710.5    | Endogenous |
| CFD     | NM_001928.2    | Endogenous |
| CFH     | NM_001014975.2 | Endogenous |
| CFI     | NM_000204.3    | Endogenous |
| CFP     | NM_002621.2    | Endogenous |
| IL2RB   | NM_000878.2    | Endogenous |
| ITGB2   | NM_000211.2    | Endogenous |
| CISH    | NM_145071.2    | Endogenous |
| CLEC4A  | NM_194448.2    | Endogenous |
| CLEC4E  | NM_014358.2    | Endogenous |
| CLEC5A  | NM_013252.2    | Endogenous |
| CLEC6A  | NM_001007033.1 | Endogenous |
| CLEC7A  | NM_197954.2    | Endogenous |
| CLU     | NM_001831.2    | Endogenous |
| KLRB1   | NM_002258.2    | Endogenous |
| CR1     | NM_000651.4    | Endogenous |
| CR2     | NM_001006658.1 | Endogenous |
| CRADD   | NM_003805.3    | Endogenous |

|           |                |            |
|-----------|----------------|------------|
| CSF1      | NM_000757.4    | Endogenous |
| CSF1R     | NM_005211.2    | Endogenous |
| KLRD1     | NM_002262.3    | Endogenous |
| CSF2RB    | NM_000395.2    | Endogenous |
| CSF3R     | NM_156038.2    | Endogenous |
| CTLA4-TM  | NM_005214.3    | Endogenous |
| CTLA4_all | NM_005214.3    | Endogenous |
| CTNNB1    | NM_001098210.1 | Endogenous |
| CTSC      | NM_001814.4    | Endogenous |
| CTSG      | NM_001911.2    | Endogenous |
| CTSS      | NM_004079.3    | Endogenous |
| CUL9      | NM_015089.2    | Endogenous |
| CX3CL1    | NM_002996.3    | Endogenous |
| KLRG1     | NM_005810.3    | Endogenous |
| CXCL1     | NM_001511.1    | Endogenous |
| CXCL10    | NM_001565.1    | Endogenous |
| CXCL11    | NM_005409.4    | Endogenous |
| CXCL12    | NM_000609.5    | Endogenous |
| CXCL13    | NM_006419.2    | Endogenous |
| KLRG2     | NM_198508.2    | Endogenous |
| CXCL9     | NM_002416.1    | Endogenous |
| KLRK1     | NM_007360.1    | Endogenous |
| CXCR2     | NM_001557.2    | Endogenous |
| TNFRSF10C | NM_003841.3    | Endogenous |
| CXCR4     | NM_003467.2    | Endogenous |
| CXCR6     | NM_006564.1    | Endogenous |
| CYBB      | NM_000397.3    | Endogenous |
| Cyclin D  | NM_001142326.1 | Endogenous |
| Cyclin E  | NM_001238.1    | Endogenous |
| DEFB1     | NM_005218.3    | Endogenous |
| DEFB103A  | NM_001081551.2 | Endogenous |
| DEFB103B  | NM_018661.3    | Endogenous |
| DEFB4A    | NM_004942.2    | Endogenous |
| DPP4      | NM_001935.3    | Endogenous |
| DUSP4     | NM_057158.2    | Endogenous |
| E2F1      | NM_005225.1    | Endogenous |
| EBI3      | NM_005755.2    | Endogenous |
| EDNRB     | NM_003991.2    | Endogenous |
| EGR1      | NM_001964.2    | Endogenous |
| EGR2      | NM_000399.3    | Endogenous |
| ENTPD1    | NM_001098175.1 | Endogenous |
| EOMES     | NM_005442.2    | Endogenous |

|          |                |            |
|----------|----------------|------------|
| ETS1     | NM_005238.3    | Endogenous |
| FADD     | NM_003824.2    | Endogenous |
| BID      | NM_001196.2    | Endogenous |
| FCAR     | NM_133280.1    | Endogenous |
| CASP3    | NM_032991.2    | Endogenous |
| FCER1G   | NM_004106.1    | Endogenous |
| CCL11    | NM_002986.2    | Endogenous |
| FCGR2A   | NM_021642.3    | Endogenous |
| CCL15    | NM_032965.3    | Endogenous |
| FCGR2B   | NM_001002273.1 | Endogenous |
| CCL18    | NM_002988.2    | Endogenous |
| FCGRT    | NM_004107.4    | Endogenous |
| FKBP5    | NM_001145775.1 | Endogenous |
| FN1      | NM_212482.1    | Endogenous |
| FOXP3    | NM_014009.3    | Endogenous |
| FYN      | NM_002037.3    | Endogenous |
| GADD45A  | NM_001924.2    | Endogenous |
| GATA3    | NM_001002295.1 | Endogenous |
| GBP1     | NM_002053.1    | Endogenous |
| GBP5     | NM_052942.3    | Endogenous |
| GFI1     | NM_005263.2    | Endogenous |
| GNLY     | NM_006433.2    | Endogenous |
| GP1BB    | NM_000407.4    | Endogenous |
| GPI      | NM_000175.2    | Endogenous |
| GPR183   | NM_004951.3    | Endogenous |
| GZMA     | NM_006144.2    | Endogenous |
| GZMB     | NM_004131.3    | Endogenous |
| GZMK     | NM_002104.2    | Endogenous |
| HAMP     | NM_021175.2    | Endogenous |
| HAVCR2   | NM_032782.3    | Endogenous |
| HFE      | NM_139011.2    | Endogenous |
| HLA-A    | NM_002116.5    | Endogenous |
| HLA-B    | NM_005514.6    | Endogenous |
| HLA-C    | NM_002117.4    | Endogenous |
| HLA-DMA  | NM_006120.3    | Endogenous |
| HLA-DMB  | NM_002118.3    | Endogenous |
| HLA-DOB  | NM_002120.3    | Endogenous |
| HLA-DPA1 | NM_033554.2    | Endogenous |
| HLA-DPB1 | NM_002121.4    | Endogenous |
| HLA-DQA1 | NM_002122.3    | Endogenous |
| HLA-DQB1 | NM_002123.3    | Endogenous |
| HLA-DRA  | NM_019111.3    | Endogenous |

|          |                |            |
|----------|----------------|------------|
| HLA-DRB1 | NM_002124.2    | Endogenous |
| HLA-DRB3 | NM_022555.3    | Endogenous |
| HRAS     | NM_005343.2    | Endogenous |
| CCL2     | NM_002982.3    | Endogenous |
| ICAM2    | NM_000873.3    | Endogenous |
| ICAM3    | NM_002162.3    | Endogenous |
| ICAM4    | NM_001039132.1 | Endogenous |
| ICAM5    | NM_003259.3    | Endogenous |
| ICOS     | NM_012092.2    | Endogenous |
| ICOSLG   | NM_015259.4    | Endogenous |
| IDO1     | NM_002164.3    | Endogenous |
| CCL3     | NM_002983.2    | Endogenous |
| IFI35    | NM_005533.3    | Endogenous |
| IFIH1    | NM_022168.2    | Endogenous |
| IFIT2    | NM_001547.4    | Endogenous |
| IFITM1   | NM_003641.3    | Endogenous |
| IFNA1/13 | NM_024013.1    | Endogenous |
| CD48     | NM_001778.2    | Endogenous |
| IFNAR1   | NM_000629.2    | Endogenous |
| IFNAR2   | NM_000874.3    | Endogenous |
| CHUK     | NM_001278.3    | Endogenous |
| IFNG     | NM_000619.2    | Endogenous |
| IFNGR1   | NM_000416.1    | Endogenous |
| IGF2R    | NM_000876.1    | Endogenous |
| IKBKAP   | NM_003640.3    | Endogenous |
| IKBKB    | NM_001556.1    | Endogenous |
| IKBKE    | NM_014002.2    | Endogenous |
| IKBKG    | NM_003639.2    | Endogenous |
| IKZF1    | NM_006060.3    | Endogenous |
| IKZF2    | NM_016260.2    | Endogenous |
| CIITA    | NM_000246.3    | Endogenous |
| IL10     | NM_000572.2    | Endogenous |
| IL10RA   | NM_001558.2    | Endogenous |
| IL11RA   | NM_147162.1    | Endogenous |
| IL12A    | NM_000882.2    | Endogenous |
| IL12B    | NM_002187.2    | Endogenous |
| CMKLR1   | NM_004072.1    | Endogenous |
| IL13     | NM_002188.2    | Endogenous |
| IL13RA1  | NM_001560.2    | Endogenous |
| IL15     | NM_172174.1    | Endogenous |
| IL16     | NM_004513.4    | Endogenous |
| IL17A    | NM_002190.2    | Endogenous |

|         |                |            |
|---------|----------------|------------|
| IL17B   | NM_014443.2    | Endogenous |
| IL17F   | NM_052872.3    | Endogenous |
| IL18    | NM_001562.2    | Endogenous |
| IL18R1  | NM_003855.2    | Endogenous |
| CSF2    | NM_000758.2    | Endogenous |
| IL19    | NM_013371.3    | Endogenous |
| IL1A    | NM_000575.3    | Endogenous |
| IL1B    | NM_000576.2    | Endogenous |
| IL1R1   | NM_000877.2    | Endogenous |
| IL1R2   | NM_173343.1    | Endogenous |
| IL1RAP  | NM_002182.2    | Endogenous |
| IL1RL1  | NM_016232.4    | Endogenous |
| IL1RL2  | NM_003854.2    | Endogenous |
| IL1RN   | NM_000577.3    | Endogenous |
| IL2     | NM_000586.2    | Endogenous |
| IL20    | NM_018724.3    | Endogenous |
| IL21    | NM_021803.2    | Endogenous |
| CX3CR1  | NM_001337.3    | Endogenous |
| IL22    | NM_020525.4    | Endogenous |
| IL22RA2 | NM_181310.1    | Endogenous |
| IL23A   | NM_016584.2    | Endogenous |
| IL23R   | NM_144701.2    | Endogenous |
| IL26    | NM_018402.1    | Endogenous |
| IL27    | NM_145659.3    | Endogenous |
| IL28A   | NM_172138.1    | Endogenous |
| IL28A/B | NM_172139.2    | Endogenous |
| IL29    | NM_172140.1    | Endogenous |
| IL2RA   | NM_000417.1    | Endogenous |
| CXCL2   | NM_002089.3    | Endogenous |
| IL2RG   | NM_000206.1    | Endogenous |
| IL3     | NM_000588.3    | Endogenous |
| IL32    | NM_001012633.1 | Endogenous |
| IL4     | NM_000589.2    | Endogenous |
| IL4R    | NM_000418.2    | Endogenous |
| IL5     | NM_000879.2    | Endogenous |
| IL6     | NM_000600.1    | Endogenous |
| IL6R    | NM_000565.2    | Endogenous |
| IL6ST   | NM_002184.2    | Endogenous |
| IL7     | NM_000880.2    | Endogenous |
| IL7R    | NM_002185.2    | Endogenous |
| IL8     | NM_000584.2    | Endogenous |
| IL9     | NM_000590.1    | Endogenous |

|                           |                |            |
|---------------------------|----------------|------------|
| ILF3                      | NM_001137673.1 | Endogenous |
| IRAK1                     | NM_001569.3    | Endogenous |
| IRAK2                     | NM_001570.3    | Endogenous |
| IRAK3                     | NM_007199.1    | Endogenous |
| IRAK4                     | NM_016123.1    | Endogenous |
| IRF1                      | NM_002198.1    | Endogenous |
| IRF3                      | NM_001571.5    | Endogenous |
| IRF4                      | NM_002460.1    | Endogenous |
| IRF5                      | NM_002200.3    | Endogenous |
| IRF7                      | NM_001572.3    | Endogenous |
| CXCR1                     | NM_000634.2    | Endogenous |
| IRGM                      | NM_001145805.1 | Endogenous |
| ITGA2B                    | NM_000419.3    | Endogenous |
| ITGA4                     | NM_000885.4    | Endogenous |
| ITGA5                     | NM_002205.2    | Endogenous |
| ITGA6                     | NM_000210.1    | Endogenous |
| ITGAE                     | NM_002208.4    | Endogenous |
| ITGAL                     | NM_002209.2    | Endogenous |
| ITGAM                     | NM_000632.3    | Endogenous |
| ITGAX                     | NM_000887.3    | Endogenous |
| ITGB1                     | NM_033666.2    | Endogenous |
| CXCR3                     | NM_001504.1    | Endogenous |
| ITLN1                     | NM_017625.2    | Endogenous |
| ITLN2                     | NM_080878.2    | Endogenous |
| JAK1                      | NM_002227.1    | Endogenous |
| JAK2                      | NM_004972.2    | Endogenous |
| JAK3                      | NM_000215.2    | Endogenous |
| KCNJ2                     | NM_000891.2    | Endogenous |
| KIR3DL1                   | NM_013289.2    | Endogenous |
| KIR3DL2                   | NM_006737.2    | Endogenous |
| KIR3DL3                   | NM_153443.3    | Endogenous |
| KIR_Activating_Subgroup_1 | NM_001083539.1 | Endogenous |
| KIR_Activating_Subgroup_2 | NM_014512.1    | Endogenous |
| KIR_Inhibiting_Subgroup_1 | NM_014218.2    | Endogenous |
| KIR_Inhibiting_Subgroup_2 | NM_014511.3    | Endogenous |
| KIT                       | NM_000222.2    | Endogenous |
| KLRAP1                    | NR_028045.1    | Endogenous |
| ICAM1                     | NM_000201.2    | Endogenous |
| KLRC1                     | NM_002259.3    | Endogenous |
| KLRC2                     | NM_002260.3    | Endogenous |
| KLRC3                     | NM_007333.2    | Endogenous |
| KLRC4                     | NM_013431.2    | Endogenous |

|          |                |            |
|----------|----------------|------------|
| IFI16    | NM_005531.1    | Endogenous |
| KLRF1    | NM_016523.1    | Endogenous |
| KLRF2    | NM_001190765.1 | Endogenous |
| IFNA2    | NM_000605.3    | Endogenous |
| IFNB1    | NM_002176.2    | Endogenous |
| IKZF3    | NM_183232.2    | Endogenous |
| LAG3     | NM_002286.5    | Endogenous |
| LAIR1    | NM_002287.3    | Endogenous |
| LAMP3    | NM_014398.3    | Endogenous |
| IRF8     | NM_002163.2    | Endogenous |
| LCP2     | NM_005565.3    | Endogenous |
| LEF1     | NM_016269.3    | Endogenous |
| LGALS3   | NM_001177388.1 | Endogenous |
| LIF      | NM_002309.3    | Endogenous |
| LILRA1   | NM_006863.1    | Endogenous |
| LILRA2   | NM_006866.2    | Endogenous |
| LILRA3   | NM_006865.3    | Endogenous |
| LILRA4   | NM_012276.3    | Endogenous |
| LILRA5   | NM_181879.2    | Endogenous |
| LILRA6   | NM_024318.2    | Endogenous |
| LILRB1   | NM_001081637.1 | Endogenous |
| LILRB2   | NM_005874.1    | Endogenous |
| LILRB3   | NM_006864.2    | Endogenous |
| LILRB4   | NM_001081438.1 | Endogenous |
| LILRB5   | NM_001081442.1 | Endogenous |
| LITAF    | NM_004862.3    | Endogenous |
| LTA      | NM_000595.2    | Endogenous |
| LTB4R    | NM_181657.3    | Endogenous |
| LTB4R2   | NM_019839.4    | Endogenous |
| LTBR     | NM_002342.1    | Endogenous |
| LTF      | NM_002343.2    | Endogenous |
| LY96     | NM_015364.2    | Endogenous |
| MAF      | NM_005360.4    | Endogenous |
| MALT1    | NM_006785.2    | Endogenous |
| MAP4K1   | NM_007181.3    | Endogenous |
| MAP4K2   | NM_004579.2    | Endogenous |
| MAP4K4   | NM_004834.3    | Endogenous |
| MAPK1    | NM_138957.2    | Endogenous |
| MAPK11   | NM_002751.5    | Endogenous |
| MAPK14   | NM_001315.1    | Endogenous |
| MAPKAPK2 | NM_004759.3    | Endogenous |
| MARCO    | NM_006770.3    | Endogenous |



|          |                |            |
|----------|----------------|------------|
| MASP1    | NM_139125.3    | Endogenous |
| MASP2    | NM_139208.1    | Endogenous |
| MBL2     | NM_000242.2    | Endogenous |
| MBP      | NM_002385.2    | Endogenous |
| MCL1     | NM_021960.3    | Endogenous |
| MDM2     | NM_001145337.1 | Endogenous |
| MIF      | NM_002415.1    | Endogenous |
| MME      | NM_000902.2    | Endogenous |
| MR1      | NM_001531.2    | Endogenous |
| MRC1     | NM_002438.2    | Endogenous |
| MS4A1    | NM_152866.2    | Endogenous |
| MSR1     | NM_002445.3    | Endogenous |
| MUC1     | NM_001018017.1 | Endogenous |
| MX1      | NM_002462.2    | Endogenous |
| MYD88    | NM_002468.3    | Endogenous |
| NCAM1    | NM_000615.5    | Endogenous |
| NCF4     | NM_000631.4    | Endogenous |
| NCR1     | NM_004829.5    | Endogenous |
| NFATC1   | NM_172389.1    | Endogenous |
| NFATC2   | NM_012340.3    | Endogenous |
| NFATC3   | NM_004555.2    | Endogenous |
| NFIL3    | NM_005384.2    | Endogenous |
| NFKB1    | NM_003998.2    | Endogenous |
| NFKB2    | NM_002502.2    | Endogenous |
| NFKBIA   | NM_020529.1    | Endogenous |
| NFKBIZ   | NM_001005474.1 | Endogenous |
| NLRP3    | NM_001079821.2 | Endogenous |
| NOD1     | NM_006092.1    | Endogenous |
| NOD2     | NM_022162.1    | Endogenous |
| NOS2     | NM_000625.4    | Endogenous |
| NOTCH1   | NM_017617.3    | Endogenous |
| NOTCH2   | NM_024408.3    | Endogenous |
| NT5E     | NM_002526.2    | Endogenous |
| PAX5     | NM_016734.1    | Endogenous |
| PDCD1    | NM_005018.1    | Endogenous |
| PDCD1LG2 | NM_025239.3    | Endogenous |
| PDCD2    | NM_144781.2    | Endogenous |
| PDGFB    | NM_033016.2    | Endogenous |
| PDGFRB   | NM_002609.3    | Endogenous |
| PECAM1   | NM_000442.3    | Endogenous |
| PIGR     | NM_002644.2    | Endogenous |
| PLA2G2A  | NM_000300.2    | Endogenous |

|           |                |            |
|-----------|----------------|------------|
| PLA2G2E   | NM_014589.1    | Endogenous |
| PLAU      | NM_002658.2    | Endogenous |
| PLAUR     | NM_001005376.1 | Endogenous |
| PML       | NM_002675.3    | Endogenous |
| POU2F2    | NM_002698.2    | Endogenous |
| PPARG     | NM_015869.3    | Endogenous |
| LCK       | NM_005356.2    | Endogenous |
| PRDM1     | NM_001198.3    | Endogenous |
| PPBP      | NM_002704.2    | Endogenous |
| PRKCD     | NM_006254.3    | Endogenous |
| PSMB10    | NM_002801.2    | Endogenous |
| PSMB5     | NM_001130725.1 | Endogenous |
| PSMB7     | NM_002799.2    | Endogenous |
| PSMB8     | NM_004159.4    | Endogenous |
| PSMB9     | NM_002800.4    | Endogenous |
| PSMC2     | NM_002803.3    | Endogenous |
| PSMD7     | NM_002811.3    | Endogenous |
| PTAFR     | NM_000952.3    | Endogenous |
| PTGER4    | NM_000958.2    | Endogenous |
| PTGS2     | NM_000963.1    | Endogenous |
| PTK2      | NM_005607.3    | Endogenous |
| PTPN2     | NM_002828.2    | Endogenous |
| PTPN22    | NM_015967.4    | Endogenous |
| PRF1      | NM_005041.3    | Endogenous |
| PTPRC_all | NM_080921.2    | Endogenous |
| PUMA      | NM_014417.2    | Endogenous |
| PYCARD    | NM_013258.3    | Endogenous |
| RAF1      | NM_002880.2    | Endogenous |
| RAG1      | NM_000448.2    | Endogenous |
| RAG2      | NM_000536.3    | Endogenous |
| RARRES3   | NM_004585.3    | Endogenous |
| RELA      | NM_021975.2    | Endogenous |
| RELB      | NM_006509.2    | Endogenous |
| RORC      | NM_001001523.1 | Endogenous |
| RUNX1     | NM_001754.4    | Endogenous |
| S100A8    | NM_002964.3    | Endogenous |
| S100A9    | NM_002965.2    | Endogenous |
| S1PR1     | NM_001400.3    | Endogenous |
| SELE      | NM_000450.2    | Endogenous |
| SELL      | NR_029467.1    | Endogenous |
| SELPLG    | NM_003006.3    | Endogenous |
| SERPING1  | NM_000062.2    | Endogenous |

|        |                |            |
|--------|----------------|------------|
| SH2D1A | NM_001114937.2 | Endogenous |
| SIGIRR | NM_021805.2    | Endogenous |
| SKI    | NM_003036.2    | Endogenous |
| SLAMF1 | NM_003037.2    | Endogenous |
| SLAMF6 | NM_001184714.1 | Endogenous |
| SLAMF7 | NM_021181.3    | Endogenous |
| SLC2A1 | NM_006516.2    | Endogenous |
| SMAD3  | NM_005902.3    | Endogenous |
| SMAD5  | NM_005903.5    | Endogenous |
| SOCS1  | NM_003745.1    | Endogenous |
| SOCS3  | NM_003955.3    | Endogenous |
| SPP1   | NM_000582.2    | Endogenous |
| SRC    | NM_005417.3    | Endogenous |
| STAT1  | NM_007315.2    | Endogenous |
| STAT2  | NM_005419.2    | Endogenous |
| STAT3  | NM_139276.2    | Endogenous |
| STAT4  | NM_003151.2    | Endogenous |
| PTPN6  | NM_002831.5    | Endogenous |
| STAT5B | NM_012448.3    | Endogenous |
| STAT6  | NM_003153.3    | Endogenous |
| STAT5A | NM_003152.2    | Endogenous |
| TAGAP  | NM_054114.3    | Endogenous |
| TAL1   | NM_003189.2    | Endogenous |
| TAP1   | NM_000593.5    | Endogenous |
| TAP2   | NM_000544.3    | Endogenous |
| TAPBP  | NM_003190.4    | Endogenous |
| TBK1   | NM_013254.2    | Endogenous |
| TBX21  | NM_013351.1    | Endogenous |
| TCF4   | NM_003199.1    | Endogenous |
| TCF7   | NM_003202.2    | Endogenous |
| TFRC   | NM_003234.1    | Endogenous |
| TGFB1  | NM_000660.3    | Endogenous |
| TGFBI  | NM_000358.2    | Endogenous |
| TGFBR1 | NM_004612.2    | Endogenous |
| TGFBR2 | NM_001024847.1 | Endogenous |
| THY1   | NM_006288.2    | Endogenous |
| TICAM1 | NM_014261.1    | Endogenous |
| TIGIT  | NM_173799.2    | Endogenous |
| TIRAP  | NM_148910.2    | Endogenous |
| TLR1   | NM_003263.3    | Endogenous |
| TLR2   | NM_003264.3    | Endogenous |
| TLR3   | NM_003265.2    | Endogenous |

|           |                |            |
|-----------|----------------|------------|
| TLR4      | NM_138554.2    | Endogenous |
| TLR5      | NM_003268.3    | Endogenous |
| TLR7      | NM_016562.3    | Endogenous |
| TLR8      | NM_016610.2    | Endogenous |
| TLR9      | NM_017442.2    | Endogenous |
| TMEM173   | NM_198282.1    | Endogenous |
| TNF       | NM_000594.2    | Endogenous |
| TNFAIP3   | NM_006290.2    | Endogenous |
| TNFAIP6   | NM_007115.2    | Endogenous |
| SYK       | NM_003177.3    | Endogenous |
| TNFRSF11A | NM_003839.2    | Endogenous |
| TNFRSF13B | NM_012452.2    | Endogenous |
| TNFRSF13C | NM_052945.3    | Endogenous |
| TNFRSF14  | NM_003820.2    | Endogenous |
| TNFRSF17  | NM_001192.2    | Endogenous |
| TNFRSF1B  | NM_001066.2    | Endogenous |
| TNFRSF4   | NM_003327.2    | Endogenous |
| TNFRSF8   | NM_152942.2    | Endogenous |
| TNFRSF9   | NM_001561.4    | Endogenous |
| TNFSF10   | NM_003810.2    | Endogenous |
| TNFSF11   | NM_003701.2    | Endogenous |
| TNFSF12   | NM_003809.2    | Endogenous |
| TNFSF13B  | NM_006573.4    | Endogenous |
| TNFSF15   | NM_001204344.1 | Endogenous |
| TNFSF4    | NM_003326.2    | Endogenous |
| TNFSF8    | NM_001244.3    | Endogenous |
| TOLLIP    | NM_019009.2    | Endogenous |
| TP53      | NM_000546.2    | Endogenous |
| TRAF1     | NM_005658.3    | Endogenous |
| TRAF2     | NM_021138.3    | Endogenous |
| TRAF3     | NM_145725.1    | Endogenous |
| TRAF4     | NM_004295.2    | Endogenous |
| TRAF5     | NM_004619.3    | Endogenous |
| TRAF6     | NM_145803.1    | Endogenous |
| TYK2      | NM_003331.3    | Endogenous |
| UBE2L3    | NM_198157.1    | Endogenous |
| VCAM1     | NM_001078.3    | Endogenous |
| VTN       | NM_000638.3    | Endogenous |
| XBP1      | NM_005080.2    | Endogenous |
| XCL1      | NM_002995.1    | Endogenous |
| XCR1      | NM_005283.2    | Endogenous |
| ZAP70     | NM_001079.3    | Endogenous |

|        |                |              |
|--------|----------------|--------------|
| ZBTB16 | NM_006006.4    | Endogenous   |
| ZEB1   | NM_001128128.1 | Endogenous   |
| sCTLA4 | NM_001037631.1 | Endogenous   |
| ABCF1  | NM_001090.2    | Housekeeping |
| ALAS1  | NM_000688.4    | Housekeeping |
| EEF1G  | NM_001404.4    | Housekeeping |
| G6PD   | NM_000402.2    | Housekeeping |
| GAPDH  | NM_002046.3    | Housekeeping |
| GUSB   | NM_000181.1    | Housekeeping |
| HPRT1  | NM_000194.1    | Housekeeping |
| OAZ1   | NM_004152.2    | Housekeeping |
| POLR1B | NM_019014.3    | Housekeeping |
| POLR2A | NM_000937.2    | Housekeeping |
| PPIA   | NM_021130.2    | Housekeeping |
| RPL19  | NM_000981.3    | Housekeeping |
| SDHA   | NM_004168.1    | Housekeeping |
| TBP    | NM_001172085.1 | Housekeeping |
| TUBB   | NM_178014.2    | Housekeeping |

Supplemental Table 4. Nanostring output

| Probe Name | Accession #    | Il.2      | HD average | StDev of HDs | Il.2 vs. HD | DE Call of: Il.2 vs. HD |
|------------|----------------|-----------|------------|--------------|-------------|-------------------------|
| ABCB1      | NM_000927.3    | 8555,46   | 1218,05    | 110,53       | 7,02        | Yes                     |
| ADA        | NM_000022.2    | 899,96    | 1480,1     | 312,87       | -1,64       | Yes                     |
| AHR        | NM_001621.3    | 5466,55   | 845,04     | 105,37       | 6,47        | Yes                     |
| ARG2       | NM_001172.3    | 571,03    | 379,45     | 34,72        | 1,5         | Yes                     |
| ARHGDIB    | NM_001175.4    | 24636,19  | 20015,79   | 1160,07      | 1,23        | Yes                     |
| ATG12      | NM_004707.2    | 738       | 200,84     | 25,63        | 3,67        | Yes                     |
| ATG16L1    | NM_198890.2    | 3783,5    | 1626,22    | 34,46        | 2,33        | Yes                     |
| ATG5       | NM_004849.2    | 3217,48   | 1291,41    | 120,05       | 2,49        | Yes                     |
| ATG7       | NM_001136031.2 | 48,42     | 406,14     | 51,24        | -8,39       | Yes                     |
| ATR        | NM_001184.2    | 7742,33   | 1698,78    | 208,68       | 4,56        | Yes                     |
| B2M        | NM_004048.2    | 277605,06 | 123339,75  | 19412,68     | 2,25        | Yes                     |
| B3GAT1     | NM_018644.3    | 10,02     | 39,15      | 8,7          | -3,91       | Yes                     |
| BAD        | NM_004322.3    | 190,34    | 95,72      | 37,45        | 1,99        | Yes                     |
| BATF3      | NM_018664.2    | 552,67    | 83,35      | 31,32        | 6,63        | Yes                     |
| BAX        | NM_138761.3    | 4650,07   | 2607,39    | 197,16       | 1,78        | Yes                     |
| BCAP31     | NM_005745.7    | 799,78    | 2757,2     | 117,98       | -3,45       | Yes                     |
| BCL10      | NM_003921.2    | 1113,68   | 1601,62    | 309,83       | -1,44       | Yes                     |
| BCL2L11    | NM_138621.4    | 455,82    | 148,21     | 32,26        | 3,08        | Yes                     |
| BCL3       | NM_005178.2    | 1541,12   | 187,17     | 55,23        | 8,23        | Yes                     |
| BCL6       | NM_001706.2    | 9946,31   | 2080,92    | 459,99       | 4,78        | Yes                     |
| BID        | NM_001196.2    | 4144,16   | 540,87     | 63,55        | 7,66        | Yes                     |
| BLNK       | NM_013314.2    | 140,25    | 287,83     | 163,56       | -2,05       | Yes                     |
| BRCA1      | NM_007305.2    | 86,82     | 166,97     | 39,59        | -1,92       | Yes                     |
| BST2       | NM_004335.2    | 46,75     | 149,49     | 25,81        | -3,2        | Yes                     |
| BTK        | NM_000061.1    | 297,2     | 529,93     | 148,6        | -1,78       | Yes                     |
| BTLA       | NM_181780.2    | 55,1      | 158,25     | 119,15       | -2,87       | Yes                     |
| C14orf166  | NM_016039.2    | 3118,97   | 2453,15    | 263,3        | 1,27        | Yes                     |
| C1QB       | NM_000491.3    | 365,66    | 61,85      | 4,5          | 5,91        | Yes                     |
| C1QBP      | NM_001212.3    | 606,1     | 1600,2     | 253,84       | -2,64       | Yes                     |
| C6         | NM_000065.2    | 701,27    | 25,17      | 7,21         | 27,86       | Yes                     |
| CAMP       | NM_004345.3    | 115,21    | 31,75      | 6,17         | 3,63        | Yes                     |
| CASP1      | NM_001223.3    | 724,64    | 1362,5     | 44,2         | -1,88       | Yes                     |
| CASP10     | NM_032977.3    | 253,79    | 27,04      | 2,17         | 9,39        | Yes                     |
| CASP2      | NM_032982.2    | 4948,94   | 1913,04    | 89,23        | 2,59        | Yes                     |
| CASP3      | NM_032991.2    | 2593,02   | 553,42     | 137,7        | 4,69        | Yes                     |
| CCBP2      | NM_001296.3    | 106,86    | 34,21      | 8,04         | 3,12        | Yes                     |
| CCL11      | NM_002986.2    | 985,11    | 60,09      | 11,91        | 16,39       | Yes                     |
| CCL15      | NM_032965.3    | 722,97    | 35,28      | 8,27         | 20,49       | Yes                     |
| CCL16      | NM_004590.2    | 200,36    | 47,11      | 19,75        | 4,25        | Yes                     |
| CCL18      | NM_002988.2    | 768,05    | 52,89      | 8,42         | 14,52       | Yes                     |

|        |                   |          |          |         |       |     |
|--------|-------------------|----------|----------|---------|-------|-----|
| CCL2   | NM_002982.3       | 327,26   | 19,02    | 6,07    | 17,21 | Yes |
| CCL20  | NM_004591.1       | 116,88   | 19,97    | 6,18    | 5,85  | Yes |
| CCL22  | NM_002990.3       | 120,22   | 19,44    | 5,9     | 6,18  | Yes |
| CCL3   | NM_002983.2       | 1564,49  | 83,07    | 10,21   | 18,83 | Yes |
| CCL4   | NM_002984.2       | 11671,09 | 6839,19  | 1655,94 | 1,71  | Yes |
| CCL5   | NM_002985.2       | 75055,66 | 36522,25 | 5045,88 | 2,06  | Yes |
| CCND3  | NM_001760.2       | 1066,93  | 3877,95  | 665,52  | -3,63 | Yes |
| CCR1   | NM_001295.2       | 437,46   | 277,4    | 97,29   | 1,58  | Yes |
| CCR5   | NM_000579.1       | 212,05   | 51,57    | 12,92   | 4,11  | Yes |
| CCR6   | NM_031409.2       | 1123,7   | 173,16   | 198,88  | 6,49  | Yes |
| CCR8   | NM_005201.2       | 85,15    | 33,17    | 10,1    | 2,57  | Yes |
| CCRL1  | NM_016557.2       | 631,14   | 110,92   | 28,99   | 5,69  | Yes |
| CCRL2  | NM_003965.4       | 200,36   | 58,37    | 14,09   | 3,43  | Yes |
| CD14   | NM_000591.2       | 178,66   | 269,6    | 200,82  | -1,51 | Yes |
| CD160  | NM_007053.2       | 1938,5   | 2528,95  | 840,05  | -1,3  | Yes |
| CD163  | NM_004244.4       | 125,23   | 45,36    | 15,2    | 2,76  | Yes |
| CD164  | NM_006016.4       | 7613,76  | 9902,05  | 272,36  | -1,3  | Yes |
| CD19   | NM_001770.4       | 664,53   | 269,75   | 329,14  | 2,46  | Yes |
| CD2    | NM_001767.3       | 133,57   | 216,01   | 63,44   | -1,62 | Yes |
| CD209  | NM_021155.2       | 355,64   | 22,38    | 8       | 15,89 | Yes |
| CD22   | NM_001771.2       | 337,28   | 591,12   | 1124,25 | -1,75 | Yes |
| CD24   | NM_013230.2       | 150,27   | 41,59    | 18,91   | 3,61  | Yes |
| CD244  | NM_016382.2       | 661,2    | 2603,4   | 216,88  | -3,94 | Yes |
| CD247  | NM_198053.1       | 29312,98 | 15434,43 | 987,69  | 1,9   | Yes |
| CD27   | NM_001242.4       | 166,97   | 581,12   | 509,92  | -3,48 | Yes |
| CD274  | NM_014143.3       | 217,06   | 87,61    | 12,05   | 2,48  | Yes |
| CD276  | NM_001024736.1    | 198,69   | 48,24    | 15,01   | 4,12  | Yes |
| CD28   | NM_001243078.1    | 253,79   | 70,56    | 16,88   | 3,6   | Yes |
| CD3EAP | NM_012099.1       | 108,53   | 32,25    | 6,7     | 3,37  | Yes |
| CD40LG | NM_000074.2       | 1624,6   | 81,41    | 33,15   | 19,96 | Yes |
| CD44   | NM_001001392.1    | 8707,4   | 4970,16  | 110,45  | 1,75  | Yes |
| CD45R0 | NM_080921.3       | 240,43   | 414,63   | 110,45  | -1,72 | Yes |
| CD45RA | NM_002838.4       | 38340,96 | 15950,24 | 634,85  | 2,4   | Yes |
| CD45RB | ENST00000367367.1 | 1003,48  | 4488,91  | 248,87  | -4,47 | Yes |
| CD46   | NM_172350.1       | 1312,37  | 2707,23  | 286,72  | -2,06 | Yes |
| CD48   | NM_001778.2       | 2816,76  | 7929,51  | 749,43  | -2,82 | Yes |
| CD53   | NM_001040033.1    | 4379,58  | 12349,7  | 472,55  | -2,82 | Yes |
| CD58   | NM_001779.2       | 111,87   | 50,78    | 8,66    | 2,2   | Yes |
| CD59   | NM_000611.4       | 1437,6   | 1037,95  | 363,46  | 1,39  | Yes |
| CD6    | NM_006725.3       | 2429,39  | 947,62   | 385,48  | 2,56  | Yes |
| CD79A  | NM_001783.3       | 255,46   | 1213,95  | 1694,01 | -4,75 | Yes |
| CD79B  | NM_021602.2       | 432,45   | 186,31   | 68,59   | 2,32  | Yes |

|          |                |          |          |         |        |     |
|----------|----------------|----------|----------|---------|--------|-----|
| CD82     | NM_002231.3    | 128,57   | 78,17    | 25,12   | 1,64   | Yes |
| CD83     | NM_004233.3    | 7216,38  | 837,76   | 1146,59 | 8,61   | Yes |
| CD86     | NM_175862.3    | 1574,51  | 309,77   | 100,84  | 5,08   | Yes |
| CD8A     | NM_001768.5    | 751,36   | 1494,87  | 708,05  | -1,99  | Yes |
| CD8B     | NM_004931.3    | 75,14    | 137,49   | 152,58  | -1,83  | Yes |
| CD96     | NM_005816.4    | 1818,29  | 593,52   | 43,36   | 3,06   | Yes |
| CD97     | NM_078481.2    | 297,2    | 69,21    | 1,07    | 4,29   | Yes |
| CD99     | NM_002414.3    | 1075,28  | 2166,81  | 170,87  | -2,02  | Yes |
| CDKN1A   | NM_000389.2    | 1868,38  | 380,3    | 69,43   | 4,91   | Yes |
| CEBPB    | NM_005194.2    | 297,2    | 741,18   | 38,58   | -2,49  | Yes |
| CFB      | NM_001710.5    | 53,43    | 18,6     | 1,9     | 2,87   | Yes |
| CFH      | NM_001014975.2 | 166,97   | 68,89    | 51,38   | 2,42   | Yes |
| CFI      | NM_000204.3    | 457,49   | 32,88    | 3,07    | 13,92  | Yes |
| CFP      | NM_002621.2    | 95,17    | 175,37   | 45,96   | -1,84  | Yes |
| CHUK     | NM_001278.3    | 2382,64  | 655,79   | 41,22   | 3,63   | Yes |
| CIITA    | NM_000246.3    | 529,29   | 183,09   | 404,73  | 2,89   | Yes |
| CISH     | NM_145071.2    | 202,03   | 84,67    | 17,58   | 2,39   | Yes |
| CLEC7A   | NM_197954.2    | 824,82   | 72,91    | 11,98   | 11,31  | Yes |
| CMKLR1   | NM_004072.1    | 183,67   | 2094,89  | 262,73  | -11,41 | Yes |
| CR1      | NM_000651.4    | 240,43   | 722,91   | 384,3   | -3,01  | Yes |
| CR2      | NM_001006658.1 | 133,57   | 261,3    | 369,26  | -1,96  | Yes |
| CRADD    | NM_003805.3    | 1319,05  | 135,49   | 8,5     | 9,74   | Yes |
| CSF1     | NM_000757.4    | 335,61   | 133,9    | 37,62   | 2,51   | Yes |
| CSF1R    | NM_005211.2    | 145,26   | 385,37   | 96,39   | -2,65  | Yes |
| CSF2     | NM_000758.2    | 136,91   | 22,36    | 2,62    | 6,12   | Yes |
| CSF2RB   | NM_000395.2    | 706,28   | 411,7    | 216,27  | 1,72   | Yes |
| CSF3R    | NM_156038.2    | 36,73    | 285,55   | 187,55  | -7,77  | Yes |
| CTSC     | NM_001814.4    | 2382,64  | 5332,91  | 262,64  | -2,24  | Yes |
| CTSG     | NM_001911.2    | 60,11    | 24,74    | 7,36    | 2,43   | Yes |
| CTSS     | NM_004079.3    | 7371,66  | 10200,31 | 900,96  | -1,38  | Yes |
| CX3CR1   | NM_001337.3    | 267,15   | 3207,28  | 171,75  | -12,01 | Yes |
| CXCL1    | NM_001511.1    | 308,89   | 39,72    | 23,61   | 7,78   | Yes |
| CXCL10   | NM_001565.1    | 106,86   | 18,52    | 4,92    | 5,77   | Yes |
| CXCL2    | NM_002089.3    | 682,9    | 47,87    | 33,1    | 14,27  | Yes |
| CXCL9    | NM_002416.1    | 113,54   | 20,82    | 3,89    | 5,45   | Yes |
| CXCR1    | NM_000634.2    | 492,56   | 121,59   | 17,43   | 4,05   | Yes |
| CXCR2    | NM_001557.2    | 245,44   | 829,37   | 227,02  | -3,38  | Yes |
| CXCR3    | NM_001504.1    | 1958,54  | 215,79   | 50,56   | 9,08   | Yes |
| CXCR4    | NM_003467.2    | 13556,17 | 9897,47  | 1475,73 | 1,37   | Yes |
| CXCR6    | NM_006564.1    | 392,38   | 147,36   | 37,45   | 2,66   | Yes |
| CYBB     | NM_000397.3    | 727,98   | 2676,86  | 707,11  | -3,68  | Yes |
| Cyclin E | NM_001238.1    | 312,23   | 166,13   | 42,8    | 1,88   | Yes |



|          |                |          |          |         |        |     |
|----------|----------------|----------|----------|---------|--------|-----|
| DEFB1    | NM_005218.3    | 155,28   | 53,5     | 8,45    | 2,9    | Yes |
| DEFB103A | NM_001081551.2 | 310,56   | 30,98    | 10,45   | 10,03  | Yes |
| DUSP4    | NM_057158.2    | 2279,12  | 72,13    | 37,73   | 31,6   | Yes |
| E2F1     | NM_005225.1    | 325,59   | 161,14   | 50,36   | 2,02   | Yes |
| EGR1     | NM_001964.2    | 1120,36  | 757,06   | 41,06   | 1,48   | Yes |
| EGR2     | NM_000399.3    | 98,51    | 37,12    | 5,47    | 2,65   | Yes |
| ENTPD1   | NM_001098175.1 | 2441,08  | 493,38   | 165,14  | 4,95   | Yes |
| ETS1     | NM_005238.3    | 7354,96  | 18704,29 | 1496,29 | -2,54  | Yes |
| FADD     | NM_003824.2    | 175,32   | 114,31   | 9,1     | 1,53   | Yes |
| FAS      | NM_000043.3    | 73,47    | 18,71    | 6,36    | 3,93   | Yes |
| FCAR     | NM_133280.1    | 48,42    | 17,89    | 1,85    | 2,71   | Yes |
| FCER1A   | NM_002001.2    | 28,38    | 1095,06  | 526,42  | -38,58 | Yes |
| FCER1G   | NM_004106.1    | 10921,41 | 20397,66 | 1286,44 | -1,87  | Yes |
| FCGR1A/B | NM_000566.3    | 161,96   | 49,29    | 1,31    | 3,29   | Yes |
| FCGR2A   | NM_021642.3    | 81,81    | 199,21   | 30,53   | -2,43  | Yes |
| FCGR2A/C | NM_201563.4    | 425,77   | 1193,36  | 135,36  | -2,8   | Yes |
| FCGR2B   | NM_001002273.1 | 43,41    | 100,73   | 58,29   | -2,32  | Yes |
| FCGR3A/B | NM_000570.4    | 5009,05  | 23174,2  | 1408,81 | -4,63  | Yes |
| FKBP5    | NM_001145775.1 | 175,32   | 1201,21  | 121,29  | -6,85  | Yes |
| GADD45A  | NM_001924.2    | 996,8    | 676,23   | 17,22   | 1,47   | Yes |
| GATA3    | NM_001002295.1 | 300,54   | 141,77   | 23,48   | 2,12   | Yes |
| GBP1     | NM_002053.1    | 1547,8   | 627,65   | 46,15   | 2,47   | Yes |
| GBP5     | NM_052942.3    | 130,24   | 339,61   | 181,53  | -2,61  | Yes |
| GFI1     | NM_005263.2    | 7837,5   | 1222,5   | 290,13  | 6,41   | Yes |
| GNLY     | NM_006433.2    | 64132,58 | 49382,47 | 328,12  | 1,3    | Yes |
| GPR183   | NM_004951.3    | 13273,99 | 2748,15  | 746,36  | 4,83   | Yes |
| GZMB     | NM_004131.3    | 3942,12  | 7930,39  | 2250,83 | -2,01  | Yes |
| HAVCR2   | NM_032782.3    | 1746,49  | 2237,97  | 548,74  | -1,28  | Yes |
| HFE      | NM_139011.2    | 283,85   | 53,98    | 9,07    | 5,26   | Yes |
| HLA-A    | NM_002116.5    | 11545,87 | 9322,5   | 2131,77 | 1,24   | Yes |
| HLA-B    | NM_005514.6    | 61898,54 | 41438,44 | 3244,81 | 1,49   | Yes |
| HLA-DMB  | NM_002118.3    | 773,06   | 322,57   | 121,71  | 2,4    | Yes |
| HLA-DOB  | NM_002120.3    | 884,93   | 632,47   | 498,38  | 1,4    | Yes |
| HLA-DPB1 | NM_002121.4    | 7172,96  | 2077,55  | 4172,79 | 3,45   | Yes |
| HLA-DQB1 | NM_002123.3    | 30,05    | 80,17    | 487,05  | -2,67  | Yes |
| HLA-DRA  | NM_019111.3    | 10737,74 | 14771,74 | 9660,82 | -1,38  | Yes |
| HLA-DRB1 | NM_002124.2    | 485,88   | 226,15   | 672,7   | 2,15   | Yes |
| HLA-DRB3 | NM_022555.3    | 452,48   | 248,2    | 625,41  | 1,82   | Yes |
| ICAM1    | NM_000201.2    | 4294,43  | 598,74   | 88,74   | 7,17   | Yes |
| ICAM2    | NM_000873.3    | 666,2    | 3762,83  | 629,51  | -5,65  | Yes |
| ICAM3    | NM_002162.3    | 1512,73  | 2437,89  | 164,82  | -1,61  | Yes |
| ICOSLG   | NM_015259.4    | 983,44   | 109,49   | 104,22  | 8,98   | Yes |

|         |                |          |          |         |        |     |
|---------|----------------|----------|----------|---------|--------|-----|
| IDO1    | NM_002164.3    | 586,06   | 32,67    | 2,64    | 17,94  | Yes |
| IFI16   | NM_005531.1    | 639,49   | 1893,74  | 60,22   | -2,96  | Yes |
| IFIH1   | NM_022168.2    | 606,1    | 249,83   | 45,58   | 2,43   | Yes |
| IFIT2   | NM_001547.4    | 2115,49  | 602,67   | 115,88  | 3,51   | Yes |
| IFITM1  | NM_003641.3    | 49417,65 | 65216,93 | 8267,61 | -1,32  | Yes |
| IFNA2   | NM_000605.3    | 980,1    | 48,05    | 23,7    | 20,4   | Yes |
| IFNAR2  | NM_000874.3    | 1567,83  | 2747,68  | 257,2   | -1,75  | Yes |
| IFNB1   | NM_002176.2    | 2731,6   | 24,05    | 7,02    | 113,58 | Yes |
| IFNG    | NM_000619.2    | 225,41   | 110,62   | 36,67   | 2,04   | Yes |
| IGF2R   | NM_000876.1    | 2541,26  | 3681,87  | 651,55  | -1,45  | Yes |
| IKBKAP  | NM_003640.3    | 105,19   | 510,6    | 32,24   | -4,85  | Yes |
| IKBKB   | NM_001556.1    | 382,36   | 608      | 45,92   | -1,59  | Yes |
| IKZF1   | NM_006060.3    | 4027,28  | 2723,36  | 326,63  | 1,48   | Yes |
| IKZF2   | NM_016260.2    | 589,4    | 1158,84  | 151,46  | -1,97  | Yes |
| IKZF3   | NM_183232.2    | 8320,04  | 2952,6   | 495,31  | 2,82   | Yes |
| IL10RA  | NM_001558.2    | 1644,64  | 4121,05  | 588,11  | -2,51  | Yes |
| IL12B   | NM_002187.2    | 487,55   | 37,03    | 5,04    | 13,17  | Yes |
| IL12RB1 | NM_005535.1    | 338,95   | 1215,07  | 288,56  | -3,58  | Yes |
| IL13RA1 | NM_001560.2    | 46,75    | 146,48   | 97,87   | -3,13  | Yes |
| IL15    | NM_172174.1    | 2000,28  | 221,01   | 52,33   | 9,05   | Yes |
| IL17F   | NM_052872.3    | 121,89   | 27,61    | 6,15    | 4,41   | Yes |
| IL18    | NM_001562.2    | 981,77   | 149,71   | 26,5    | 6,56   | Yes |
| IL18R1  | NM_003855.2    | 894,95   | 1643,51  | 507,46  | -1,84  | Yes |
| IL18RAP | NM_003853.2    | 21418,71 | 6442,07  | 1912,43 | 3,32   | Yes |
| IL1B    | NM_000576.2    | 1036,87  | 131,02   | 79,35   | 7,91   | Yes |
| IL1R2   | NM_173343.1    | 263,81   | 127,06   | 26,32   | 2,08   | Yes |
| IL1RN   | NM_000577.3    | 387,37   | 67,57    | 26,57   | 5,73   | Yes |
| IL20    | NM_018724.3    | 165,3    | 19,74    | 2,76    | 8,38   | Yes |
| IL21R   | NM_021798.2    | 3227,5   | 842,46   | 202,78  | 3,83   | Yes |
| IL23A   | NM_016584.2    | 225,41   | 97,11    | 19      | 2,32   | Yes |
| IL28A/B | NM_172139.2    | 115,21   | 35,61    | 0,85    | 3,24   | Yes |
| IL2RB   | NM_000878.2    | 62102,24 | 23537,61 | 4177,83 | 2,64   | Yes |
| IL2RG   | NM_000206.1    | 17394,77 | 24899,1  | 900,27  | -1,43  | Yes |
| IL3     | NM_000588.3    | 88,49    | 21,37    | 0,51    | 4,14   | Yes |
| IL32    | NM_001012633.1 | 6545,16  | 283,46   | 83,95   | 23,09  | Yes |
| IL4R    | NM_000418.2    | 6874,09  | 2126,35  | 1488,14 | 3,23   | Yes |
| IL6R    | NM_000565.2    | 115,21   | 248,68   | 75,54   | -2,16  | Yes |
| IL6ST   | NM_002184.2    | 1450,96  | 471,46   | 31,46   | 3,08   | Yes |
| IL7     | NM_000880.2    | 390,71   | 87,12    | 48,39   | 4,48   | Yes |
| IL8     | NM_000584.2    | 158,62   | 32,26    | 23,07   | 4,92   | Yes |
| ILF3    | NM_001137673.1 | 5312,94  | 1348,96  | 310,15  | 3,94   | Yes |
| IRAK2   | NM_001570.3    | 288,86   | 200,29   | 49,89   | 1,44   | Yes |

|                           |                |           |          |         |       |     |
|---------------------------|----------------|-----------|----------|---------|-------|-----|
| IRF1                      | NM_002198.1    | 2088,78   | 1302,57  | 176,58  | 1,6   | Yes |
| IRF3                      | NM_001571.5    | 200,36    | 461,14   | 11,94   | -2,3  | Yes |
| IRF4                      | NM_002460.1    | 1006,82   | 718,29   | 291,48  | 1,4   | Yes |
| IRF8                      | NM_002163.2    | 971,76    | 355,84   | 150,13  | 2,73  | Yes |
| IRGM                      | NM_001145805.1 | 1158,76   | 100,09   | 26,57   | 11,58 | Yes |
| ITGA2B                    | NM_000419.3    | 146,93    | 76,06    | 10,75   | 1,93  | Yes |
| ITGA5                     | NM_002205.2    | 1587,87   | 977,26   | 173,42  | 1,62  | Yes |
| ITGA6                     | NM_000210.1    | 297,2     | 2166,35  | 588,16  | -7,29 | Yes |
| ITGAE                     | NM_002208.4    | 6688,76   | 1369,45  | 173,83  | 4,88  | Yes |
| ITGAL                     | NM_002209.2    | 13925,17  | 17715,55 | 713,06  | -1,27 | Yes |
| ITGAM                     | NM_000632.3    | 9465,44   | 5969,57  | 1306,25 | 1,59  | Yes |
| ITGAX                     | NM_000887.3    | 1467,65   | 1927,02  | 265,06  | -1,31 | Yes |
| ITGB2                     | NM_000211.2    | 1091,97   | 3144,56  | 726,21  | -2,88 | Yes |
| ITLN1                     | NM_017625.2    | 166,97    | 35,75    | 10,4    | 4,67  | Yes |
| JAK2                      | NM_004972.2    | 166,97    | 380,18   | 23,12   | -2,28 | Yes |
| JAK3                      | NM_000215.2    | 467,51    | 902,05   | 116,12  | -1,93 | Yes |
| KIR3DL1                   | NM_013289.2    | 647,84    | 1087,98  | 1281,92 | -1,68 | Yes |
| KIR3DL2                   | NM_006737.2    | 1442,61   | 2798,51  | 107,78  | -1,94 | Yes |
| KIR_Activating_Subgroup_1 | NM_001083539.1 | 801,45    | 271,85   | 518,77  | 2,95  | Yes |
| KIR_Activating_Subgroup_2 | NM_014512.1    | 1225,55   | 534,64   | 626,48  | 2,29  | Yes |
| KIR_Inhibiting_Subgroup_2 | NM_014511.3    | 904,97    | 695,54   | 430,53  | 1,3   | Yes |
| KIT                       | NM_000222.2    | 407,4     | 243,84   | 4,78    | 1,67  | Yes |
| KLRB1                     | NM_002258.2    | 142729,64 | 29905,44 | 2653,36 | 4,77  | Yes |
| KLRC1                     | NM_002259.3    | 1182,14   | 825,34   | 455,11  | 1,43  | Yes |
| KLRC2                     | NM_002260.3    | 1377,49   | 690,81   | 523,3   | 1,99  | Yes |
| KLRC3                     | NM_007333.2    | 1147,07   | 1475,83  | 724,25  | -1,29 | Yes |
| KLRC4                     | NM_013431.2    | 637,82    | 1169,87  | 214,05  | -1,83 | Yes |
| KLRD1                     | NM_002262.3    | 1983,59   | 15974,73 | 1512,1  | -8,05 | Yes |
| KLRG1                     | NM_005810.3    | 106,86    | 841,4    | 224,29  | -7,87 | Yes |
| KLRG2                     | NM_198508.2    | 243,77    | 38,31    | 2,4     | 6,36  | Yes |
| KLRK1                     | NM_007360.1    | 158,62    | 59,66    | 14,87   | 2,66  | Yes |
| LAIR1                     | NM_002287.3    | 1794,91   | 4774,28  | 499,27  | -2,66 | Yes |
| LAMP3                     | NM_014398.3    | 732,99    | 31,54    | 6,02    | 23,24 | Yes |
| LCK                       | NM_005356.2    | 721,3     | 5074,53  | 468,75  | -7,04 | Yes |
| LCP2                      | NM_005565.3    | 2569,64   | 5045,35  | 141,85  | -1,96 | Yes |
| LILRA2                    | NM_006866.2    | 285,52    | 144,97   | 25,03   | 1,97  | Yes |
| LILRA3                    | NM_006865.3    | 230,42    | 78,58    | 50,28   | 2,93  | Yes |
| LILRA4                    | NM_012276.3    | 193,68    | 58,95    | 8,23    | 3,29  | Yes |
| LILRA5                    | NM_181879.2    | 664,53    | 104,98   | 61,11   | 6,33  | Yes |
| LILRA6                    | NM_024318.2    | 1604,57   | 96,17    | 22,47   | 16,69 | Yes |
| LILRB1                    | NM_001081637.1 | 202,03    | 581,1    | 259,46  | -2,88 | Yes |
| LILRB2                    | NM_005874.1    | 160,29    | 321,86   | 77,25   | -2,01 | Yes |

|          |                |          |          |         |       |     |
|----------|----------------|----------|----------|---------|-------|-----|
| LILRB4   | NM_001081438.1 | 509,25   | 128,82   | 134,6   | 3,95  | Yes |
| LILRB5   | NM_001081442.1 | 123,56   | 26,9     | 7,73    | 4,59  | Yes |
| LTA      | NM_000595.2    | 854,88   | 139,66   | 57,12   | 6,12  | Yes |
| LTBR     | NM_002342.1    | 225,41   | 40,9     | 2,11    | 5,51  | Yes |
| MAF      | NM_005360.4    | 173,65   | 97,28    | 5,82    | 1,78  | Yes |
| MALT1    | NM_006785.2    | 1165,44  | 1920,81  | 375,39  | -1,65 | Yes |
| MAP4K1   | NM_007181.3    | 1577,85  | 2324,82  | 470,89  | -1,47 | Yes |
| MAP4K2   | NM_004579.2    | 4534,86  | 1102,04  | 269,16  | 4,11  | Yes |
| MAPK11   | NM_002751.5    | 482,54   | 74,91    | 5,07    | 6,44  | Yes |
| MAPK14   | NM_001315.1    | 913,32   | 668      | 63,05   | 1,37  | Yes |
| MAPKAPK2 | NM_004759.3    | 2060,39  | 1133,8   | 127,22  | 1,82  | Yes |
| MARCO    | NM_006770.3    | 103,52   | 25,86    | 2,73    | 4     | Yes |
| MASP1    | NM_139125.3    | 405,73   | 54,37    | 4,8     | 7,46  | Yes |
| MBL2     | NM_000242.2    | 75,14    | 25,84    | 1,65    | 2,91  | Yes |
| MBP      | NM_002385.2    | 784,75   | 299,73   | 27,73   | 2,62  | Yes |
| MDM2     | NM_001145337.1 | 540,98   | 294,27   | 83,22   | 1,84  | Yes |
| MME      | NM_000902.2    | 285,52   | 70,76    | 27,2    | 4,04  | Yes |
| MR1      | NM_001531.2    | 646,17   | 389,73   | 72,34   | 1,66  | Yes |
| MS4A1    | NM_152866.2    | 362,32   | 2057,97  | 3583,28 | -5,68 | Yes |
| MYD88    | NM_002468.3    | 11358,86 | 3700,08  | 177,69  | 3,07  | Yes |
| NCAM1    | NM_000615.5    | 1450,96  | 2956,94  | 492,11  | -2,04 | Yes |
| NCR1     | NM_004829.5    | 2801,73  | 5576,72  | 1508,56 | -1,99 | Yes |
| NFATC2   | NM_012340.3    | 9657,46  | 7695,73  | 547     | 1,25  | Yes |
| NFATC3   | NM_004555.2    | 5883,97  | 9586,43  | 1204,13 | -1,63 | Yes |
| NFIL3    | NM_005384.2    | 941,7    | 1884,25  | 247,4   | -2    | Yes |
| NFKB1    | NM_003998.2    | 16050,68 | 690,62   | 45,83   | 23,24 | Yes |
| NFKB2    | NM_002502.2    | 535,97   | 32,47    | 10,84   | 16,51 | Yes |
| NFKBIA   | NM_020529.1    | 851,54   | 112,96   | 15,91   | 7,54  | Yes |
| NOD2     | NM_022162.1    | 1257,27  | 232,18   | 32,38   | 5,41  | Yes |
| NOTCH1   | NM_017617.3    | 1028,53  | 765,93   | 224,14  | 1,34  | Yes |
| PAX5     | NM_016734.1    | 1105,33  | 736,42   | 1504,16 | 1,5   | Yes |
| PDGFRB   | NM_002609.3    | 215,39   | 502,08   | 130,96  | -2,33 | Yes |
| PECAM1   | NM_000442.3    | 4079,04  | 3018,91  | 273,05  | 1,35  | Yes |
| PML      | NM_002675.3    | 514,26   | 934,45   | 338,69  | -1,82 | Yes |
| POU2F2   | NM_002698.2    | 182      | 558,32   | 250,02  | -3,07 | Yes |
| PPARG    | NM_015869.3    | 161,96   | 31,85    | 2,1     | 5,09  | Yes |
| PPBP     | NM_002704.2    | 2374,29  | 85,79    | 168,92  | 27,67 | Yes |
| PRDM1    | NM_001198.3    | 2325,87  | 4293,02  | 742,96  | -1,85 | Yes |
| PRF1     | NM_005041.3    | 11948,26 | 54719,07 | 6921,39 | -4,58 | Yes |
| PSMB10   | NM_002801.2    | 1349,1   | 2387,92  | 233,97  | -1,77 | Yes |
| PSMB7    | NM_002799.2    | 5369,71  | 3480,02  | 399,31  | 1,54  | Yes |
| PSMB9    | NM_002800.4    | 2608,05  | 6259,75  | 1316,6  | -2,4  | Yes |

|           |                |          |         |         |       |     |
|-----------|----------------|----------|---------|---------|-------|-----|
| PSMC2     | NM_002803.3    | 5919,03  | 2135,85 | 133,47  | 2,77  | Yes |
| PSMD7     | NM_002811.3    | 9640,76  | 3537,01 | 257,89  | 2,73  | Yes |
| PTAFR     | NM_000952.3    | 520,94   | 101,93  | 63,07   | 5,11  | Yes |
| PTGER4    | NM_000958.2    | 235,43   | 144,57  | 17,41   | 1,63  | Yes |
| PTGS2     | NM_000963.1    | 190,34   | 126,61  | 187,7   | 1,5   | Yes |
| PTK2      | NM_005607.3    | 956,73   | 259,95  | 89,83   | 3,68  | Yes |
| PTPN2     | NM_002828.2    | 235,43   | 137,65  | 11,37   | 1,71  | Yes |
| PTPN22    | NM_015967.4    | 1374,15  | 2199,84 | 524,04  | -1,6  | Yes |
| PTPN6     | NM_002831.5    | 941,7    | 2930,15 | 771,92  | -3,11 | Yes |
| PTPRC_all | NM_080921.2    | 2327,54  | 1270,29 | 64,19   | 1,83  | Yes |
| PUMA      | NM_014417.2    | 101,85   | 48,68   | 4,28    | 2,09  | Yes |
| PYCARD    | NM_013258.3    | 71,8     | 305,97  | 39,88   | -4,26 | Yes |
| RAF1      | NM_002880.2    | 2943,65  | 1540,12 | 6,78    | 1,91  | Yes |
| RAG1      | NM_000448.2    | 110,2    | 60,8    | 8,11    | 1,81  | Yes |
| RARRES3   | NM_004585.3    | 5733,7   | 8948,66 | 1381,71 | -1,56 | Yes |
| RELA      | NM_021975.2    | 1369,14  | 698,86  | 120,63  | 1,96  | Yes |
| RELB      | NM_006509.2    | 303,88   | 105,01  | 12,02   | 2,89  | Yes |
| RORC      | NM_001001523.1 | 120,22   | 70,17   | 7,82    | 1,71  | Yes |
| RUNX1     | NM_001754.4    | 277,17   | 740,49  | 121,91  | -2,67 | Yes |
| S100A8    | NM_002964.3    | 367,33   | 1281,54 | 1010,36 | -3,49 | Yes |
| SELL      | NR_029467.1    | 4406,3   | 10571,6 | 709,35  | -2,4  | Yes |
| SELPLG    | NM_003006.3    | 150,27   | 451,13  | 30,03   | -3    | Yes |
| SERPING1  | NM_000062.2    | 784,75   | 147,28  | 9,24    | 5,33  | Yes |
| SH2D1A    | NM_001114937.2 | 2856,83  | 1608,03 | 460,41  | 1,78  | Yes |
| SIGIRR    | NM_021805.2    | 936,69   | 2192,36 | 679,78  | -2,34 | Yes |
| SKI       | NM_003036.2    | 17047,48 | 4538,79 | 706,25  | 3,76  | Yes |
| SLAMF6    | NM_001184714.1 | 125,23   | 1094,13 | 159,2   | -8,74 | Yes |
| SLAMF7    | NM_021181.3    | 3654,94  | 5060,82 | 635,64  | -1,38 | Yes |
| SMAD5     | NM_005903.5    | 2249,06  | 1052,28 | 89,94   | 2,14  | Yes |
| SOCS3     | NM_003955.3    | 136,91   | 63,88   | 8,42    | 2,14  | Yes |
| SPP1      | NM_000582.2    | 230,42   | 37,07   | 8,78    | 6,22  | Yes |
| SRC       | NM_005417.3    | 90,16    | 36,73   | 5,87    | 2,45  | Yes |
| STAT2     | NM_005419.2    | 1300,68  | 2350,05 | 150,98  | -1,81 | Yes |
| STAT3     | NM_139276.2    | 1763,19  | 2639,15 | 80,01   | -1,5  | Yes |
| STAT4     | NM_003151.2    | 1315,71  | 1978,04 | 455,67  | -1,5  | Yes |
| STAT5A    | NM_003152.2    | 2616,4   | 806,45  | 46,93   | 3,24  | Yes |
| STAT5B    | NM_012448.3    | 242,1    | 527,28  | 116,37  | -2,18 | Yes |
| STAT6     | NM_003153.3    | 514,26   | 4977,17 | 723,25  | -9,68 | Yes |
| SYK       | NM_003177.3    | 753,03   | 2461,64 | 867,37  | -3,27 | Yes |
| TAGAP     | NM_054114.3    | 7855,87  | 4085,88 | 1220,67 | 1,92  | Yes |
| TAL1      | NM_003189.2    | 374,01   | 99,44   | 38,81   | 3,76  | Yes |
| TAP1      | NM_000593.5    | 1268,96  | 905,09  | 173,57  | 1,4   | Yes |

|           |                |          |          |         |       |     |
|-----------|----------------|----------|----------|---------|-------|-----|
| TAPBP     | NM_003190.4    | 1345,77  | 2055,44  | 182,74  | -1,53 | Yes |
| TBK1      | NM_013254.2    | 1586,2   | 609,65   | 26,81   | 2,6   | Yes |
| TBX21     | NM_013351.1    | 6812,31  | 10490,53 | 2202,93 | -1,54 | Yes |
| TCF4      | NM_003199.1    | 1210,52  | 874,17   | 332,78  | 1,38  | Yes |
| TCF7      | NM_003202.2    | 5560,05  | 2932,14  | 193,28  | 1,9   | Yes |
| TFRC      | NM_003234.1    | 2385,98  | 605,69   | 174,9   | 3,94  | Yes |
| TGFB1     | NM_000660.3    | 13891,77 | 6230,58  | 1586,88 | 2,23  | Yes |
| TGFBI     | NM_000358.2    | 222,07   | 688,63   | 359,53  | -3,1  | Yes |
| TGFBR1    | NM_004612.2    | 2062,06  | 3371,22  | 508,81  | -1,63 | Yes |
| TGFBR2    | NM_001024847.1 | 1031,86  | 683,42   | 145,34  | 1,51  | Yes |
| TIRAP     | NM_148910.2    | 298,87   | 134      | 25,5    | 2,23  | Yes |
| TLR3      | NM_003265.2    | 445,81   | 311,51   | 9,27    | 1,43  | Yes |
| TLR4      | NM_138554.2    | 178,66   | 111,56   | 17,09   | 1,6   | Yes |
| TLR7      | NM_016562.3    | 866,57   | 88,11    | 29,53   | 9,84  | Yes |
| TLR8      | NM_016610.2    | 123,56   | 36,71    | 10,14   | 3,37  | Yes |
| TLR9      | NM_017442.2    | 581,05   | 192,31   | 54,05   | 3,02  | Yes |
| TMEM173   | NM_198282.1    | 141,92   | 726,56   | 156,05  | -5,12 | Yes |
| TNF       | NM_000594.2    | 268,82   | 124,88   | 34,55   | 2,15  | Yes |
| TNFAIP3   | NM_006290.2    | 42383,27 | 9845,48  | 418,06  | 4,3   | Yes |
| TNFRSF10C | NM_003841.3    | 36,73    | 200,6    | 158,18  | -5,46 | Yes |
| TNFRSF13B | NM_012452.2    | 106,86   | 218,41   | 119,74  | -2,04 | Yes |
| TNFRSF14  | NM_003820.2    | 267,15   | 503,09   | 219,55  | -1,88 | Yes |
| TNFRSF17  | NM_001192.2    | 472,52   | 1410     | 2683,39 | -2,98 | Yes |
| TNFRSF1B  | NM_001066.2    | 2992,07  | 1243,34  | 291,12  | 2,41  | Yes |
| TNFRSF8   | NM_152942.2    | 519,27   | 102,02   | 17,83   | 5,09  | Yes |
| TNFSF10   | NM_003810.2    | 1796,58  | 774,31   | 140,91  | 2,32  | Yes |
| TNFSF12   | NM_003809.2    | 76,81    | 366,87   | 126,97  | -4,78 | Yes |
| TNFSF13B  | NM_006573.4    | 714,62   | 431,9    | 63,86   | 1,65  | Yes |
| TNFSF15   | NM_001204344.1 | 716,29   | 52,37    | 6,49    | 13,68 | Yes |
| TNFSF4    | NM_003326.2    | 1190,48  | 144,31   | 25,33   | 8,25  | Yes |
| TOLLIP    | NM_019009.2    | 557,67   | 328,22   | 78,21   | 1,7   | Yes |
| TP53      | NM_000546.2    | 549,33   | 1390,08  | 171     | -2,53 | Yes |
| TRAF1     | NM_005658.3    | 689,58   | 358,18   | 79,96   | 1,93  | Yes |
| TRAF2     | NM_021138.3    | 358,98   | 156,52   | 14,91   | 2,29  | Yes |
| TRAF3     | NM_145725.1    | 2487,83  | 428,72   | 161,99  | 5,8   | Yes |
| TRAF4     | NM_004295.2    | 3958,82  | 625,44   | 181,86  | 6,33  | Yes |
| TRAF6     | NM_145803.1    | 2499,52  | 748,33   | 81,06   | 3,34  | Yes |
| TYK2      | NM_003331.3    | 724,64   | 1179,39  | 402,82  | -1,63 | Yes |
| UBE2L3    | NM_198157.1    | 768,05   | 2311,61  | 283,19  | -3,01 | Yes |
| VCAM1     | NM_001078.3    | 1225,55  | 24,51    | 8,33    | 50    | Yes |
| VTN       | NM_000638.3    | 83,48    | 22,57    | 3,44    | 3,7   | Yes |
| XBP1      | NM_005080.2    | 2033,68  | 3156,85  | 1006,48 | -1,55 | Yes |

|        |                |         |         |        |       |     |
|--------|----------------|---------|---------|--------|-------|-----|
| XCL1   | NM_002995.1    | 5499,94 | 144,29  | 13,69  | 38,12 | Yes |
| XCR1   | NM_005283.2    | 392,38  | 138,18  | 71,81  | 2,84  | Yes |
| ZAP70  | NM_001079.3    | 2357,59 | 2968,22 | 867,17 | -1,26 | Yes |
| ZBTB16 | NM_006006.4    | 5301,25 | 2460,07 | 213,42 | 2,15  | Yes |
| ZEB1   | NM_001128128.1 | 1245,58 | 638,61  | 51,35  | 1,95  | Yes |

Supplemental Table 5. Full list of pathways

| GO.ID              | Description                          | p.Val    | Genes                                                                                                    |
|--------------------|--------------------------------------|----------|----------------------------------------------------------------------------------------------------------|
| GO:0070098         | chemokine-mediated signaling pathway | 1.88E-03 | CXCL2,CCL2,XCL1,PPBP,CCL11,CCL18,CCL15,CCL3                                                              |
| GO:1990868         | response to chemokine                | 1.88E-03 | CXCL2,CCL2,XCL1,PPBP,CCL11,CCL18,CCL15,CCL3                                                              |
| GO:1990869         | cellular response to chemokine       | 1.88E-03 | CXCL2,CCL2,XCL1,PPBP,CCL11,CCL18,CCL15,CCL3                                                              |
| REAC:R-HSA-6783783 | Interleukin-10 signaling             | 4.98E-03 | CXCL2,ICAM1,CCL22,CCL2,IL12B,CD86,CCL20,IL1B,IL1RN,IL18,CXCL1,CSF2,CXCL10,PTAFR,IL8,CCL3                 |
| GO:0030593         | neutrophil chemotaxis                | 6.76E-03 | CXCL2,CCL2,XCL1,PPBP,CCL11,CCL18,CCL15,CCL3                                                              |
| GO:0071621         | granulocyte chemotaxis               | 1.03E-02 | CXCL2,CCL2,XCL1,PPBP,CCL11,CMKLR1,CCL18,CCL15,CCL3                                                       |
| GO:1990266         | neutrophil migration                 | 1.06E-02 | CXCL2,CCL2,XCL1,PPBP,CCL11,CCL18,CCL15,CCL3                                                              |
| GO:0097530         | granulocyte migration                | 1.98E-02 | CXCL2,CCL2,XCL1,PPBP,CCL11,CCL18,CCL15,CCL3                                                              |
| GO:0097529         | myeloid leukocyte                    | 4.19E-02 | CXCL2,CCL2,XCL1,PPBP,CX3CR1,CCL11,CMKLR1,CCL18,CCL15,CCL3                                                |
| REAC:R-HSA-500792  | GPCR ligand binding                  | 4.40E-02 | CXCL2,CCR6,CCL20,CD97,CXCL9,XCL1,CCR5,CXCR1,PPBP,CXCL1,CX3CR1,CXCL10,PTAFR,IL8,GPR183,CMKLR1,CXCR3,CCL16 |
| REAC:R-HSA-380108  | Chemokine receptors bind chemokines  | 4.61E-02 | CXCL2,CCR6,CCL20,CXCL9,XCL1,CCR5,CXCR1,PPBP,CXCL1,CX3CR1,CXCL10,IL8,CXCR3,CCL16                          |



**Supplemental Table 6. List of antibodies**

| <b>Experiment</b>        | <b>Marker</b>        | <b>Fluorophore</b> | <b>Clone</b> | <b>Source</b>   |
|--------------------------|----------------------|--------------------|--------------|-----------------|
| NK differentiation panel | CD34                 | PE                 | 561          | Biolegend       |
|                          | CD56                 | BV421              | HCD56        | Biolegend       |
|                          | CD16                 | PE-TEXAS RED       | 3G8          | Invitrogen      |
|                          | CD45                 | BUV395             | H130         | BD Biosciences  |
|                          | CD117                | PE-CY7             | A3C6E2       | Biolegend       |
|                          | CD94                 | APC                | DX22         | Biolegend       |
|                          | CD3                  | BV711              | SK7          | Biolegend       |
|                          | NK panel             | CD56               | QD605        | HCD56           |
| CD16                     |                      | PE-TEXAS RED       | 3G8          | Biolegend       |
| CD3                      |                      | BV711              | SK7          | Biolegend       |
| NK activation panel      | CD107a               | APC                | H4A3         | Biolegend       |
|                          | CD16                 | PE-CF594           | 3G8          | BD Biosciences  |
|                          | CD56                 | PeCy7              | NCAM16.2     | BD Biosciences  |
|                          | CD3                  | V500               | UCHT1        | BD Biosciences  |
|                          | IFN- $\gamma$        | AF700              | B27          | Biolegend       |
|                          | Perforin             | BV421              | dG9          | Biolegend       |
| NK maturation panel      | CD14                 | AF700              | 63D3         | Biolegend       |
|                          | CD16                 | PE-CF594           | 3G8          | BD Biosciences  |
|                          | CD56                 | PE-Cy7             | NCAM16.2     | BD Biosciences  |
|                          | CD3                  | V500               | UCHT1        | BD Biosciences  |
|                          | CXCR1                | PerCP/Cy5.5        | 8F1/CXCR1    | Biolegend       |
|                          | CXCR3                | BV650              | G025H7       | Biolegend       |
|                          | CX3CR1               | APC                | 2A9-1        | Biolegend       |
|                          | CD94                 | FITC               | DX22         | Biolegend       |
|                          | CD57                 | PB                 | HNK-1        | Biolegend       |
|                          | CMKLR1               | PE                 | 84939        | R&D Systems     |
|                          | Memory T cells panel | CD4                | PE/Cy5       | RPA-T4          |
| CD3                      |                      | PE                 | BW264/56     | Miltenyi Biotec |
| CD8                      |                      | V450               | RPA-T8       | BD Biosciences  |
| CD27                     |                      | APC/Cy7            | O323         | Biolegend       |
| CD45RA                   |                      | FITC               | HI100        | BD Biosciences  |
| T cells subsets panel    | CD3                  | V500               | UCHT1        | BD Biosciences  |
|                          | CD19                 | APCH7              | SJ25C1       | BD Biosciences  |
|                          | CD8a                 | BV785              | RPA-T8       | Biolegend       |
|                          | TCR V $\alpha$ 7.2   | PE                 | 3C10         | Biolegend       |
|                          | CD161                | APC                | HP-3G10      | Invitrogen      |
|                          | TCR $\gamma\delta$   | FITC               | B1           | BD Biosciences  |

|              |                  |             |                   |                        |
|--------------|------------------|-------------|-------------------|------------------------|
| Western blot | GINS4            |             | Rabbit polyclonal | Abcam ab101346         |
|              | GINS1            |             | EPR13359          | Abcam ab181112         |
|              | GINS2            |             | Rabbit polyclonal | proteintech 16247-1ap  |
|              | GINS3            |             | Rabbit polyclonal | proteintech 15651-1-ap |
|              | ACTIN            |             | Rabbit polyclonal | Sigma A5060            |
|              | phospho-CHK1     |             | d12h3             | cell signaling 12302s  |
|              | CHK1             |             | 2G1D5             | cell signaling 2360s   |
|              | ubPCNA           |             | D5C7P             | cell signaling 13439s  |
|              | PCNA             |             | Rabbit polyclonal | abcam 18197            |
|              | Goat anti-mouse  | IRDye 680RD |                   | Licor 926-68070        |
|              | Goat anti-rabbit | IRDye 800CW |                   | Licor 926-32211        |

**Supplemental Table 7. List of taqman assays**

| <b>Taqman assay</b> | <b>Assay cod</b> | <b>Source</b> |
|---------------------|------------------|---------------|
| GINS4               | HS01077879_m1    | Thermofisher  |
| GINS1               | Hs01040834_m1    | Thermofisher  |
| GINS2               | Hs00211479_m1    | Thermofisher  |
| GINS3               | Hs01090589_m1    | Thermofisher  |
| CX3CR1              | Hs01598433_m1    | Thermofisher  |
| CMKLR1              | HS01386064_m1    | Thermofisher  |
| CXCR1               | Hs01921207_s1    | Thermofisher  |
| CXCR3               | Hs00171041_m1    | Thermofisher  |
| HPRT1               | HS02800695_m1    | Thermofisher  |

Full unedited gels  
Conte et al.

Full unedited gel for Figure 3A

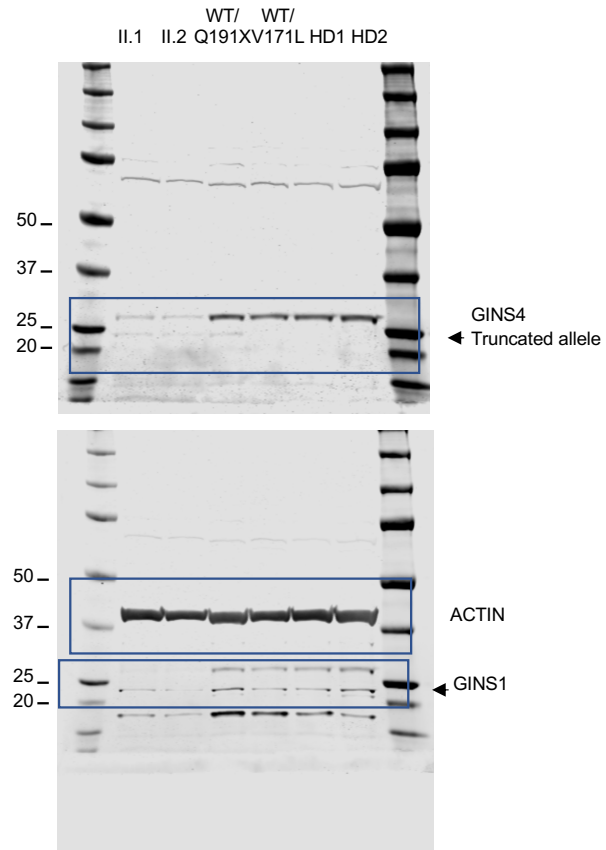

Full unedited gel for Figure 3C

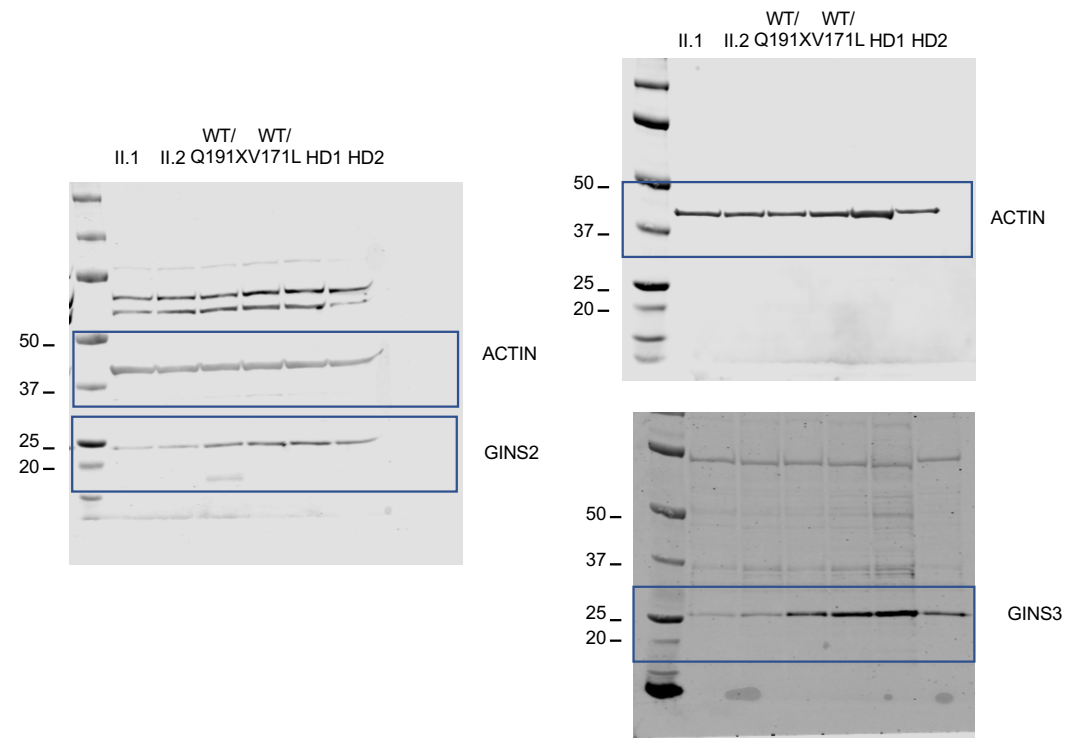

Full unedited gel for Figure 3D

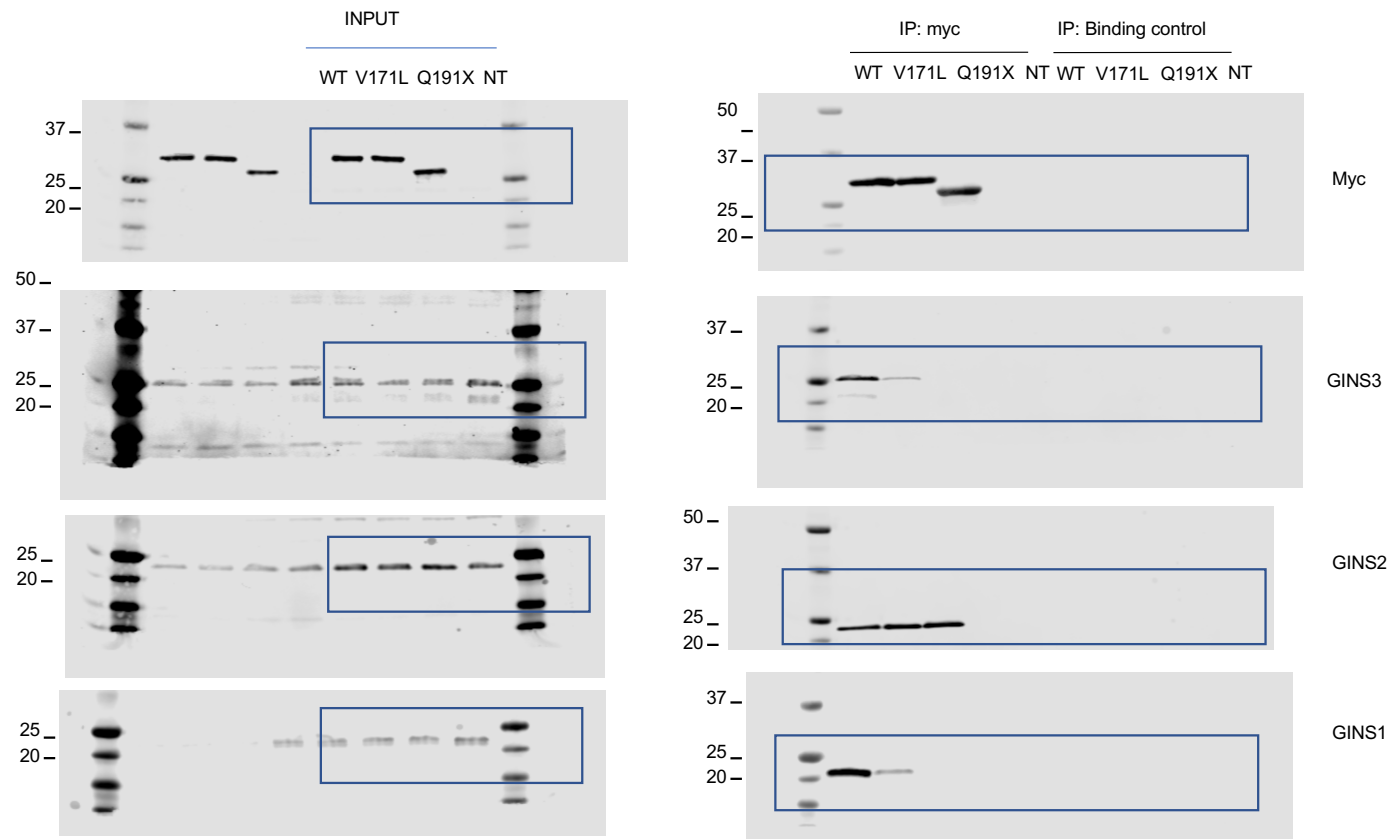

Full unedited gel for Figure 4E

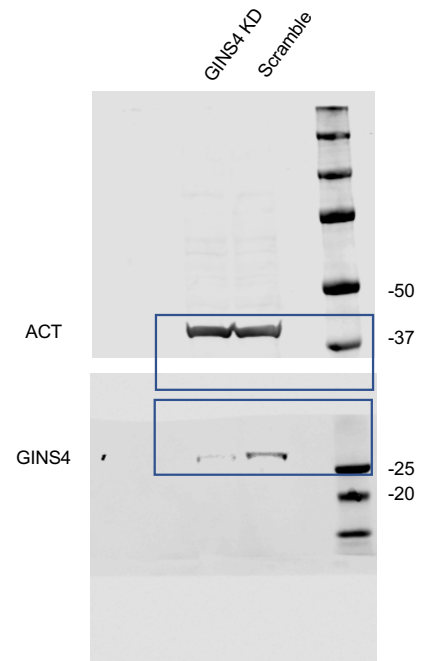

Full unedited gel for Supplemental figure 6

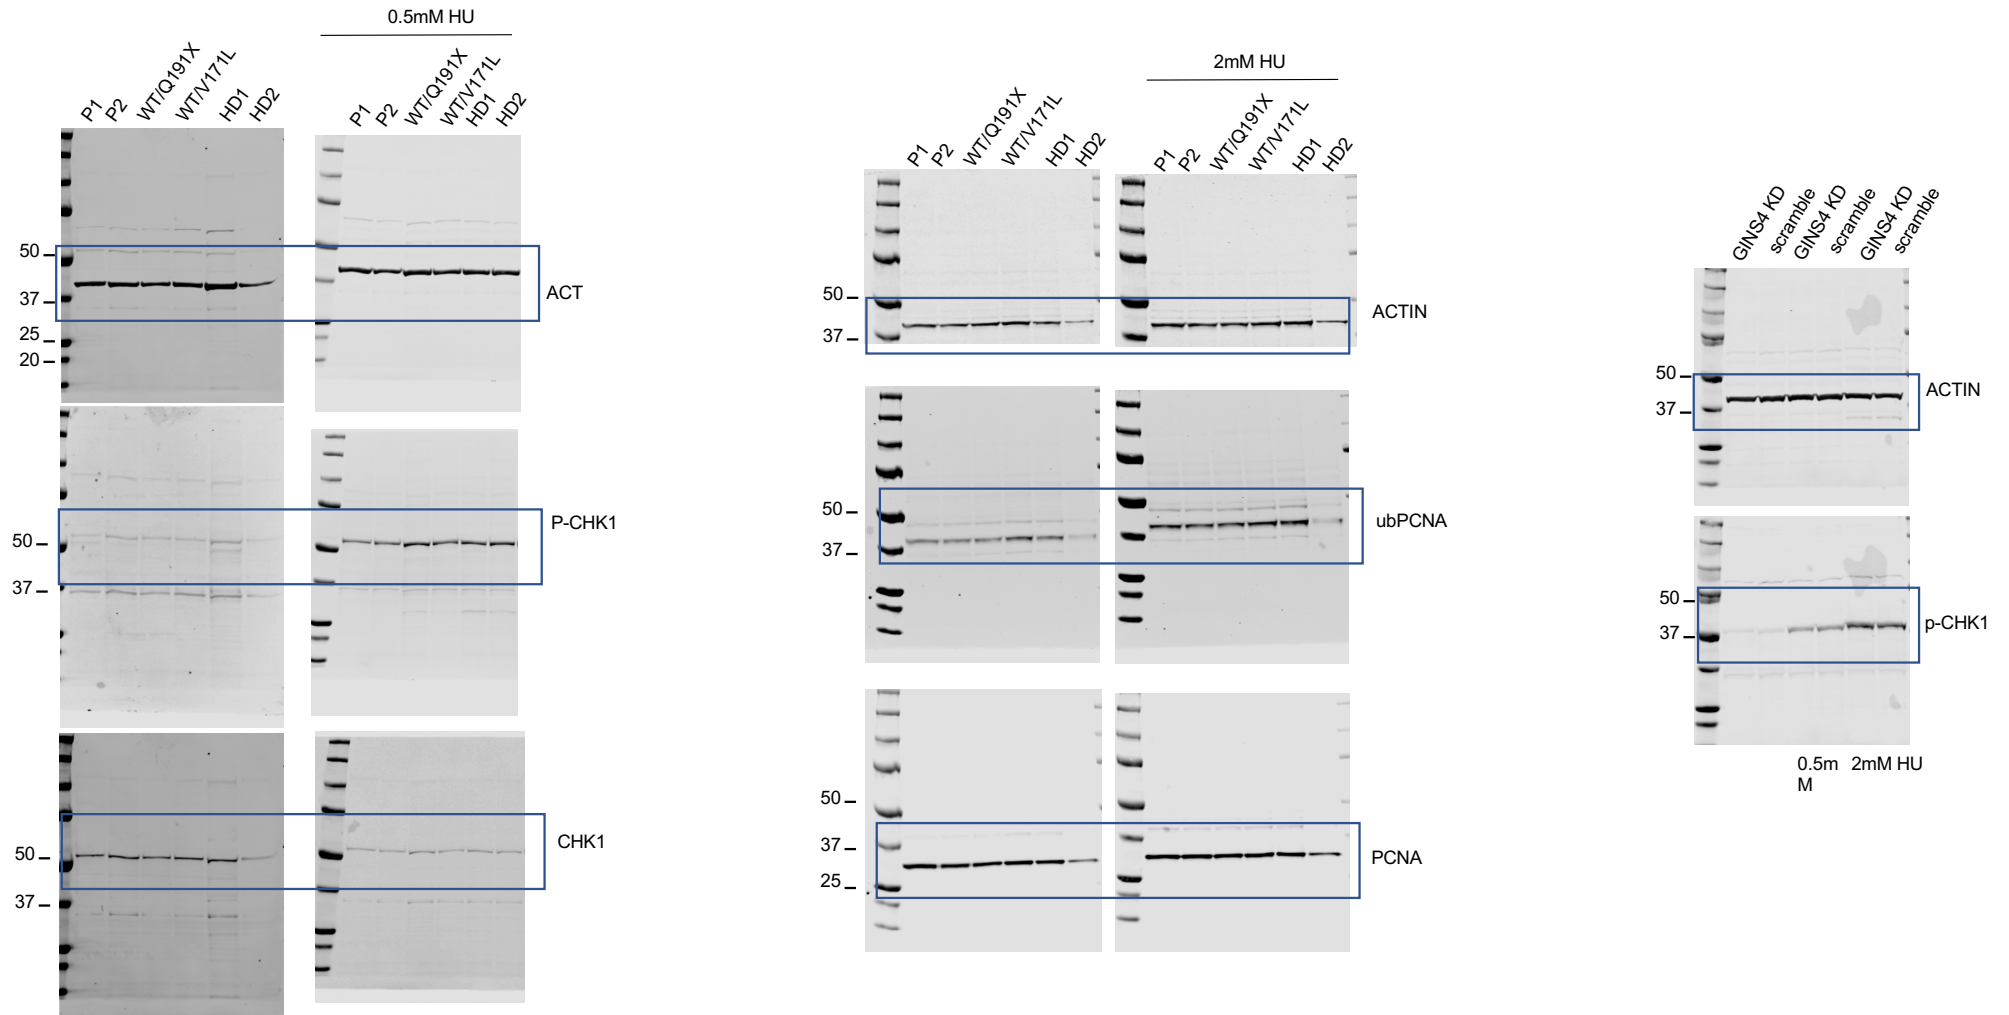

Supplement: jciinsight-7-154948-s241.pdf [file jciinsight-7-154948-s241.pdf]
